# Supplementary material for: MIPAS IMK/IAA version 8 retrieval of nitric oxide and lower thermospheric temperature
Source: Copernicus journal article supplement (doi:10.5194/amt-2022-260), 2022-10-28
Supplement: Supplementary file [file amt-2022-260-AC2-supplement.pdf]

*Supplement to*  
**MIPAS IMK/IAA version 8 retrieval of nitric oxide and lower  
thermospheric temperature**

**Bernd Funke et al.**

*Correspondence to:* Bernd Funke (bernd@iaa.es)

This document serves as reference for the definitions of the representative atmospheres used for the calculation of nitric oxide error budgets, as listed in Tab. S1, and as collection of the respective error budgets for V8R\_NO\_561 (MA) data, which are listed in tables S2–S35 and depicted in figures S1–S34.

The errors are presented as relative errors in percent, regardless of whether they are additive or multiplicative errors. They were calculated with respect to the average nitric oxide profile that was calculated from the single geolocations which contribute to the respective representative atmospheres.

**Table S1.** Labels and definitions of the representative atmospheric conditions which were used to calculate the error budget for FR and RR data.

| representative atmosphere label   | month(s) used | latitude range | solar zenith angle range |
|-----------------------------------|---------------|----------------|--------------------------|
| Northern polar winter day         | Jan, Feb      | 65°N – 90°N    | < 90°                    |
| Northern polar winter night       | Jan, Feb      | 65°N – 90°N    | > 98°                    |
| Northern polar spring day         | Apr           | 65°N – 90°N    | < 90°                    |
| Northern polar spring night       | Apr           | 65°N – 90°N    | > 98°                    |
| Northern polar summer day         | Jul, Aug      | 65°N – 90°N    | < 90°                    |
| Northern polar summer night       | Jul, Aug      | 65°N – 90°N    | > 98°                    |
| Northern polar autumn day         | Oct           | 65°N – 90°N    | < 90°                    |
| Northern polar autumn night       | Oct           | 65°N – 90°N    | > 98°                    |
| Northern midlatitude winter day   | Jan, Feb      | 40°N – 60°N    | < 90°                    |
| Northern midlatitude winter night | Jan, Feb      | 40°N – 60°N    | > 98°                    |
| Northern midlatitude spring day   | Apr           | 40°N – 60°N    | < 90°                    |
| Northern midlatitude spring night | Apr           | 40°N – 60°N    | > 98°                    |
| Northern midlatitude summer day   | Jul, Aug      | 40°N – 60°N    | < 90°                    |
| Northern midlatitude summer night | Jul, Aug      | 40°N – 60°N    | > 98°                    |
| Northern midlatitude autumn day   | Oct           | 40°N – 60°N    | < 90°                    |
| Northern midlatitude autumn night | Oct           | 40°N – 60°N    | > 98°                    |
| Tropics day                       | Apr           | 20°S – 20°N    | < 90°                    |
| Tropics night                     | Apr           | 20°S – 20°N    | > 98°                    |
| Southern midlatitude winter day   | Jul, Aug      | 40°S – 60°S    | < 90°                    |
| Southern midlatitude winter night | Jul, Aug      | 40°S – 60°S    | > 98°                    |
| Southern midlatitude spring day   | Oct           | 40°S – 60°S    | < 90°                    |
| Southern midlatitude spring night | Oct           | 40°S – 60°S    | > 98°                    |
| Southern midlatitude summer day   | Jan, Feb      | 40°S – 60°S    | < 90°                    |
| Southern midlatitude summer night | Jan, Feb      | 40°S – 60°S    | > 98°                    |
| Southern midlatitude autumn day   | Apr           | 40°S – 60°S    | < 90°                    |
| Southern midlatitude autumn night | Apr           | 40°S – 60°S    | > 98°                    |
| Southern polar winter day         | Jul, Aug      | 65°S – 90°S    | < 90°                    |
| Southern polar winter night       | Jul, Aug      | 65°S – 90°S    | > 98°                    |
| Southern polar spring day         | Oct           | 65°S – 90°S    | < 90°                    |
| Southern polar spring night       | Oct           | 65°S – 90°S    | > 98°                    |
| Southern polar summer day         | Jan, Feb      | 65°S – 90°S    | < 90°                    |
| Southern polar summer night       | Jan, Feb      | 65°S – 90°S    | > 98°                    |
| Southern polar autumn day         | Apr           | 65°S – 90°S    | < 90°                    |
| Southern polar autumn night       | Apr           | 65°S – 90°S    | > 98°                    |

**Table S2.** Nitric oxide error budget for Northern polar winter day. All uncertainties are  $1\sigma$ .

| altitude (km) | mean target (ppmv) | NLTE (%) | interf (%) | ILS (%) | shift (%) | offset (%) | gain (%) | spectro (%) | T+LOS (%) | noise (%) | random (%) | syst (%) | total (%) |
|---------------|--------------------|----------|------------|---------|-----------|------------|----------|-------------|-----------|-----------|------------|----------|-----------|
| 30            | 0.00               | 9.85     | 0.52       | 0.65    | 0.37      | 1.37       | 2.16     | 12.39       | 2.15      | 40.62     | 41.14      | 14.83    | 43.73     |
| 40            | 0.01               | 13.46    | 0.18       | 2.16    | 0.31      | 1.43       | 2.68     | 12.96       | 2.83      | 44.07     | 44.84      | 17.40    | 48.10     |
| 50            | 0.01               | 14.72    | 0.22       | 2.09    | 0.19      | 0.99       | 1.77     | 12.56       | 4.72      | 56.08     | 57.24      | 16.58    | 59.59     |
| 60            | 0.02               | 16.88    | 0.30       | 2.14    | 0.24      | 1.52       | 1.24     | 12.67       | 9.44      | 54.86     | 56.90      | 17.74    | 59.60     |
| 70            | 0.11               | 15.42    | 0.20       | 2.19    | 0.17      | 1.31       | 1.04     | 11.19       | 11.58     | 36.75     | 39.91      | 16.20    | 43.08     |
| 80            | 0.55               | 15.01    | 0.20       | 1.77    | 0.12      | 1.06       | 0.91     | 9.69        | 12.40     | 30.84     | 34.85      | 14.65    | 37.81     |
| 90            | 3.31               | 16.85    | 0.20       | 1.36    | 0.21      | 1.85       | 0.69     | 7.91        | 13.14     | 32.28     | 35.96      | 16.55    | 39.58     |
| 100           | 21.54              | 20.06    | 0.16       | 1.00    | 0.20      | 2.50       | 0.55     | 6.69        | 19.17     | 24.75     | 32.48      | 19.49    | 37.88     |
| 110           | 120.59             | 15.12    | 0.27       | 1.19    | 0.05      | 1.66       | 0.62     | 6.49        | 39.83     | 16.55     | 43.77      | 14.85    | 46.22     |
| 120           | 186.00             | 16.79    | 0.19       | 1.67    | 0.05      | 1.28       | 0.58     | 7.86        | 32.04     | 10.18     | 34.07      | 17.84    | 38.46     |
| 130           | 203.89             | 21.15    | 0.07       | 1.81    | 0.07      | 1.16       | 0.63     | 8.85        | 21.22     | 8.06      | 23.25      | 22.47    | 32.34     |
| 140           | 236.83             | 23.02    | 0.20       | 1.80    | 0.09      | 1.07       | 0.71     | 9.06        | 15.86     | 9.13      | 18.97      | 24.33    | 30.85     |
| 150           | 264.19             | 24.40    | 0.28       | 1.72    | 0.10      | 1.19       | 0.77     | 8.85        | 11.98     | 11.15     | 17.37      | 25.40    | 30.77     |

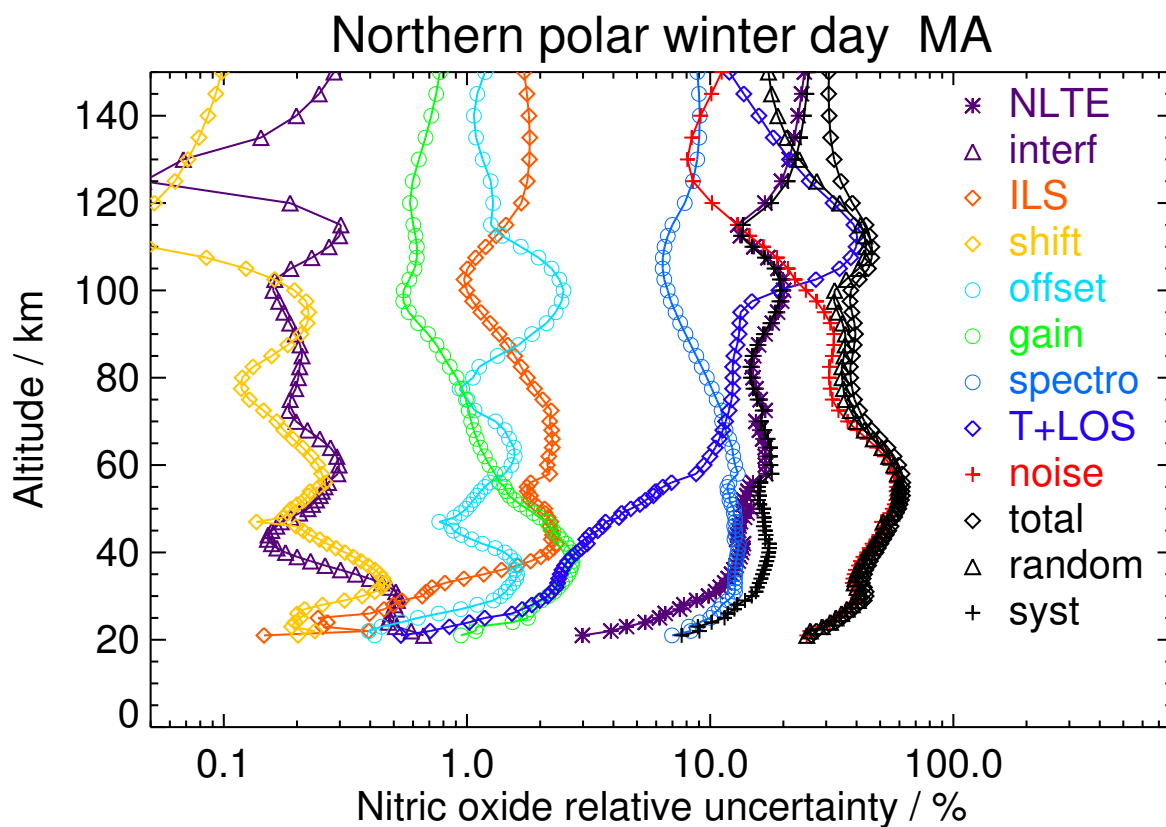

**Figure S1.** V8R\_NO\_561 Northern polar winter day

**Table S3.** Nitric oxide error budget for Northern polar winter night. All uncertainties are  $1\sigma$ .

| altitude<br>(km) | mean target<br>(ppmv) | NLTE<br>(%) | interf<br>(%) | ILS<br>(%) | shift<br>(%) | offset<br>(%) | gain<br>(%) | spectro<br>(%) | T+LOS<br>(%) | noise<br>(%) | random<br>(%) | syst<br>(%) | total<br>(%) |
|------------------|-----------------------|-------------|---------------|------------|--------------|---------------|-------------|----------------|--------------|--------------|---------------|-------------|--------------|
| 40               | 0.00                  | 3.57        | 1.63          | 0.86       | 0.83         | 3.14          | 7.44        | 4.84           | 2.12         | 80.82        | 81.28         | 5.92        | 81.50        |
| 50               | 0.00                  | 7.21        | 0.20          | 1.10       | 0.22         | 0.93          | 1.88        | 7.01           | 3.91         | 54.40        | 55.00         | 7.49        | 55.51        |
| 60               | 0.04                  | 14.09       | 0.30          | 1.44       | 0.34         | 1.52          | 1.28        | 9.96           | 8.56         | 48.63        | 50.92         | 12.25       | 52.37        |
| 70               | 0.27                  | 15.31       | 0.23          | 1.48       | 0.30         | 1.84          | 1.03        | 10.07          | 10.45        | 37.56        | 41.08         | 13.22       | 43.16        |
| 80               | 0.73                  | 16.73       | 0.21          | 1.34       | 0.14         | 1.71          | 0.89        | 9.21           | 9.84         | 37.39        | 40.86         | 14.00       | 43.19        |
| 90               | 4.52                  | 16.52       | 0.22          | 1.23       | 0.21         | 2.15          | 0.73        | 8.35           | 11.14        | 37.77        | 40.81         | 15.33       | 43.60        |
| 100              | 22.49                 | 19.71       | 0.23          | 1.10       | 0.22         | 2.92          | 0.65        | 7.93           | 20.52        | 33.72        | 40.87         | 18.68       | 44.94        |
| 110              | 111.02                | 17.29       | 0.24          | 1.26       | 0.09         | 2.16          | 0.62        | 7.69           | 33.70        | 23.79        | 42.15         | 17.03       | 45.45        |
| 120              | 202.51                | 17.20       | 0.14          | 1.48       | 0.02         | 0.97          | 0.56        | 7.85           | 30.09        | 10.41        | 32.79         | 17.30       | 37.07        |
| 130              | 202.15                | 20.03       | 0.07          | 1.60       | 0.05         | 1.20          | 0.53        | 8.28           | 21.49        | 9.67         | 25.24         | 19.80       | 32.08        |
| 140              | 216.22                | 20.85       | 0.15          | 1.61       | 0.05         | 1.26          | 0.54        | 8.29           | 17.17        | 11.83        | 22.87         | 20.48       | 30.70        |
| 150              | 228.36                | 20.73       | 0.20          | 1.55       | 0.06         | 1.32          | 0.53        | 7.97           | 13.99        | 13.38        | 21.45         | 20.32       | 29.55        |

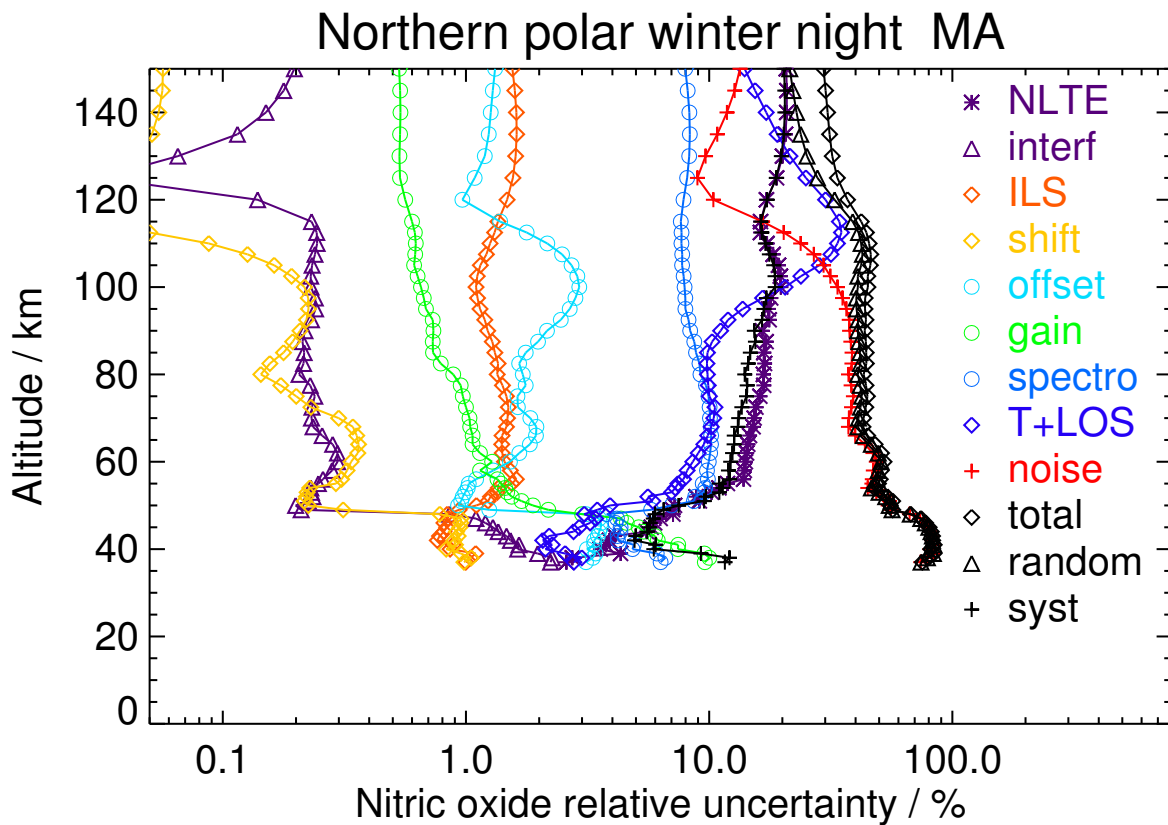**Figure S2.** V8R\_NO\_561 Northern polar winter night

**Table S4.** Nitric oxide error budget for Northern polar spring day. All uncertainties are  $1\sigma$ .

| altitude (km) | mean target (ppmv) | NLTE (%) | interf (%) | ILS (%) | shift (%) | offset (%) | gain (%) | spectro (%) | T+LOS (%) | noise (%) | random (%) | syst (%) | total (%) |
|---------------|--------------------|----------|------------|---------|-----------|------------|----------|-------------|-----------|-----------|------------|----------|-----------|
| 20            | 0.00               | 5.13     | 0.37       | 0.49    | 0.08      | 0.52       | 2.02     | 5.77        | 1.50      | 21.95     | 22.48      | 6.58     | 23.42     |
| 30            | 0.01               | 9.68     | 0.23       | 1.58    | 0.49      | 1.31       | 2.79     | 9.96        | 1.83      | 34.48     | 35.16      | 12.71    | 37.38     |
| 40            | 0.01               | 5.79     | 0.16       | 1.44    | 0.32      | 0.70       | 1.81     | 11.09       | 1.31      | 23.98     | 25.19      | 10.22    | 27.19     |
| 50            | 0.01               | 3.76     | 0.06       | 2.16    | 0.20      | 0.21       | 2.04     | 10.83       | 1.58      | 18.63     | 19.76      | 9.97     | 22.13     |
| 60            | 0.01               | 15.60    | 0.18       | 1.59    | 0.21      | 1.41       | 0.97     | 9.16        | 4.05      | 49.61     | 51.02      | 14.38    | 53.01     |
| 70            | 0.02               | 18.63    | 0.15       | 1.79    | 0.22      | 1.91       | 0.69     | 9.03        | 7.55      | 48.10     | 50.18      | 16.98    | 52.98     |
| 80            | 0.06               | 23.62    | 0.18       | 1.59    | 0.25      | 2.73       | 0.60     | 8.76        | 10.72     | 53.96     | 56.89      | 20.85    | 60.59     |
| 90            | 0.53               | 31.19    | 0.21       | 1.46    | 0.36      | 3.88       | 0.73     | 8.06        | 16.09     | 51.53     | 56.71      | 27.45    | 63.00     |
| 100           | 5.40               | 41.71    | 0.19       | 1.25    | 0.35      | 3.85       | 0.62     | 7.08        | 22.58     | 38.11     | 48.84      | 37.20    | 61.39     |
| 110           | 41.01              | 33.21    | 0.18       | 1.37    | 0.10      | 2.46       | 0.57     | 7.33        | 24.99     | 24.10     | 39.99      | 27.76    | 48.68     |
| 120           | 106.33             | 23.49    | 0.14       | 1.50    | 0.13      | 1.30       | 0.53     | 7.96        | 23.85     | 12.29     | 29.64      | 21.46    | 36.60     |
| 130           | 183.81             | 22.66    | 0.03       | 1.55    | 0.11      | 1.09       | 0.56     | 8.43        | 19.34     | 7.47      | 23.07      | 22.05    | 31.91     |
| 140           | 286.41             | 21.89    | 0.04       | 1.56    | 0.07      | 0.87       | 0.60     | 8.50        | 15.99     | 6.81      | 19.14      | 22.14    | 29.27     |
| 150           | 377.69             | 23.07    | 0.09       | 1.51    | 0.04      | 0.92       | 0.64     | 8.30        | 12.92     | 8.36      | 17.32      | 23.27    | 29.01     |

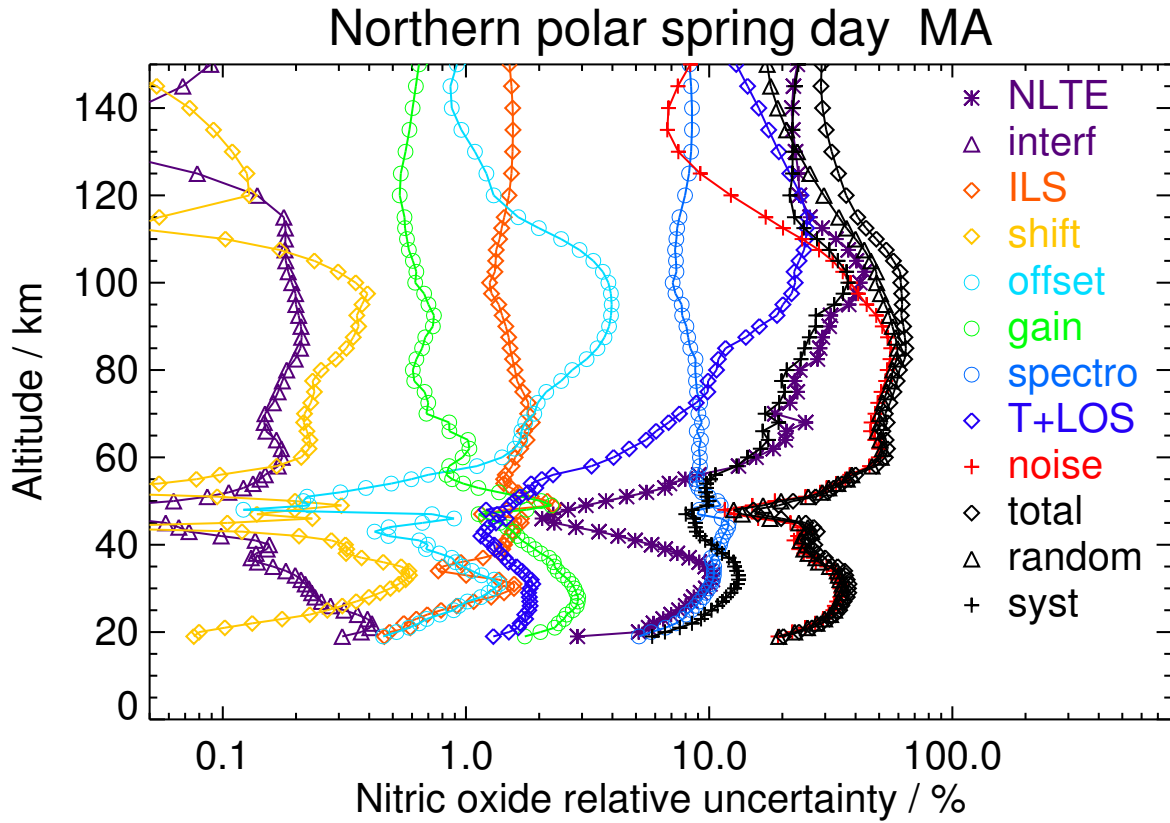

**Figure S3.** V8R\_NO\_561 Northern polar spring day

**Table S5.** Nitric oxide error budget for Northern polar spring night. All uncertainties are  $1\sigma$ .

| altitude<br>(km) | mean target<br>(ppmv) | NLTE<br>(%) | interf<br>(%) | ILS<br>(%) | shift<br>(%) | offset<br>(%) | gain<br>(%) | spectro<br>(%) | T+LOS<br>(%) | noise<br>(%) | random<br>(%) | syst<br>(%) | total<br>(%) |
|------------------|-----------------------|-------------|---------------|------------|--------------|---------------|-------------|----------------|--------------|--------------|---------------|-------------|--------------|
| 40               | 0.00                  | 6.22        | 0.53          | 0.19       | 0.02         | 0.80          | 0.97        | 1.17           | 1.21         | 41.89        | 42.32         | 2.75        | 42.41        |
| 50               | 0.00                  | 6.97        | 0.22          | 0.65       | 0.14         | 0.82          | 1.61        | 6.91           | 2.40         | 36.55        | 37.20         | 7.59        | 37.97        |
| 60               | 0.01                  | 15.76       | 0.27          | 1.19       | 0.14         | 1.81          | 2.02        | 8.17           | 4.54         | 54.03        | 55.56         | 13.30       | 57.13        |
| 70               | 0.13                  | 2.06        | 0.14          | 0.50       | 0.23         | 1.67          | 0.70        | 6.40           | 4.22         | 41.02        | 41.29         | 6.68        | 41.82        |
| 80               | 0.13                  | 4.53        | 0.28          | 0.69       | 0.34         | 2.37          | 0.45        | 5.95           | 6.51         | 51.62        | 52.17         | 6.96        | 52.63        |
| 90               | 0.74                  | 28.24       | 0.30          | 1.11       | 0.40         | 3.28          | 0.91        | 7.59           | 18.24        | 43.91        | 50.59         | 23.88       | 55.94        |
| 100              | 4.78                  | 28.25       | 0.28          | 1.24       | 0.33         | 3.81          | 0.68        | 8.09           | 22.58        | 38.69        | 47.01         | 26.02       | 53.73        |
| 110              | 37.28                 | 21.25       | 0.25          | 1.24       | 0.15         | 2.62          | 0.59        | 7.87           | 25.12        | 27.79        | 38.75         | 20.58       | 43.88        |
| 120              | 79.08                 | 17.68       | 0.13          | 1.37       | 0.05         | 1.15          | 0.49        | 8.01           | 22.13        | 12.02        | 25.94         | 18.48       | 31.85        |
| 130              | 111.49                | 18.15       | 0.02          | 1.43       | 0.07         | 1.04          | 0.49        | 7.89           | 19.02        | 7.72         | 21.21         | 19.16       | 28.58        |
| 140              | 144.80                | 18.24       | 0.09          | 1.43       | 0.05         | 1.04          | 0.50        | 7.59           | 16.58        | 9.17         | 19.70         | 19.09       | 27.43        |
| 150              | 167.97                | 18.16       | 0.13          | 1.38       | 0.03         | 1.16          | 0.51        | 7.07           | 14.24        | 11.34        | 19.30         | 18.49       | 26.73        |

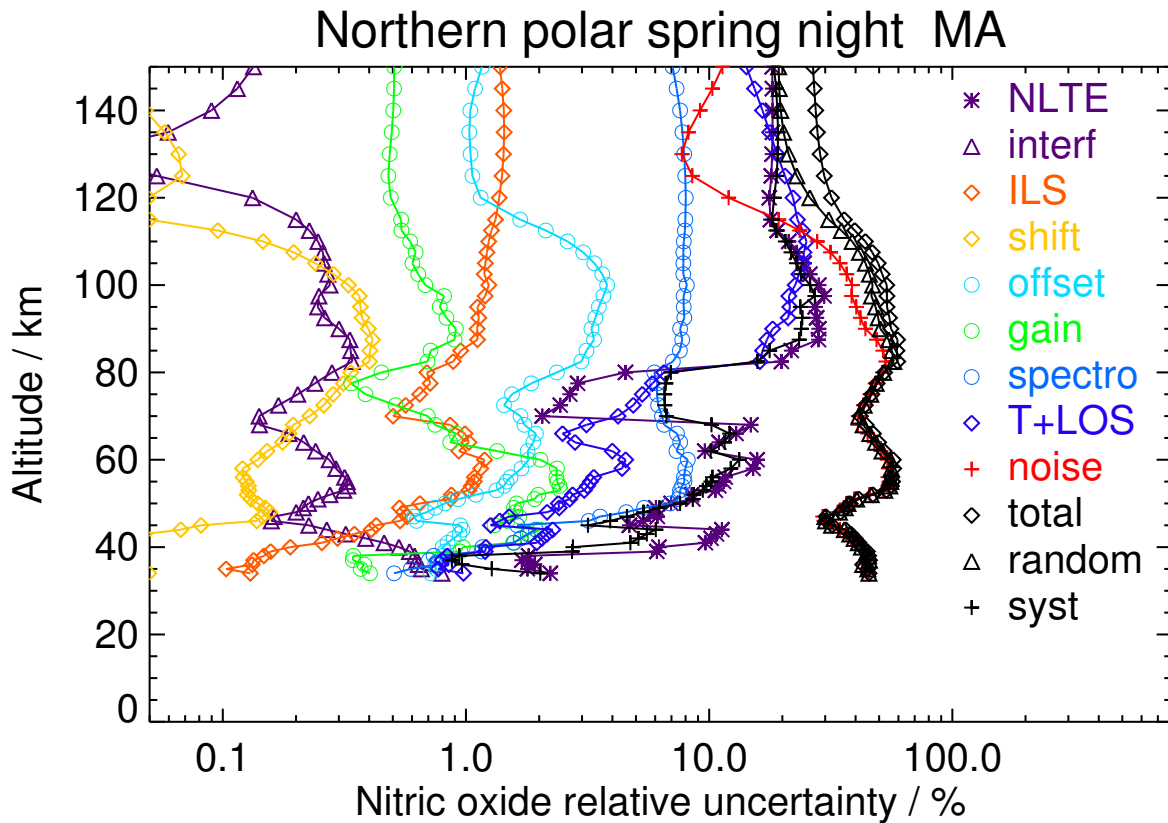**Figure S4.** V8R\_NO\_561 Northern polar spring night

**Table S6.** Nitric oxide error budget for Northern polar summer day. All uncertainties are  $1\sigma$ .

| altitude (km) | mean target (ppmv) | NLTE (%) | interf (%) | ILS (%) | shift (%) | offset (%) | gain (%) | spectro (%) | T+LOS (%) | noise (%) | random (%) | syst (%) | total (%) |
|---------------|--------------------|----------|------------|---------|-----------|------------|----------|-------------|-----------|-----------|------------|----------|-----------|
| 20            | 0.00               | 1.35     | 0.45       | 0.29    | 0.09      | 0.44       | 2.08     | 7.35        | 1.36      | 19.64     | 19.77      | 7.57     | 21.17     |
| 30            | 0.01               | 4.16     | 0.15       | 2.46    | 0.23      | 0.66       | 2.52     | 9.00        | 1.80      | 17.89     | 18.13      | 10.29    | 20.85     |
| 40            | 0.01               | 2.27     | 0.13       | 0.62    | 0.25      | 0.42       | 1.41     | 8.58        | 1.03      | 15.79     | 15.89      | 8.91     | 18.22     |
| 50            | 0.01               | 1.28     | 0.08       | 1.03    | 0.08      | 0.17       | 1.22     | 8.01        | 0.73      | 18.15     | 18.22      | 8.15     | 19.96     |
| 60            | 0.01               | 8.26     | 0.22       | 1.38    | 0.40      | 1.12       | 1.09     | 8.86        | 5.44      | 41.42     | 42.22      | 10.66    | 43.55     |
| 70            | 0.02               | 15.20    | 0.17       | 1.89    | 0.63      | 1.40       | 1.14     | 10.25       | 18.06     | 38.43     | 43.68      | 15.44    | 46.33     |
| 80            | 0.03               | 15.51    | 0.28       | 1.81    | 0.80      | 2.32       | 0.96     | 10.83       | 35.84     | 41.30     | 55.33      | 17.23    | 57.95     |
| 90            | 0.81               | 24.60    | 0.21       | 1.44    | 0.71      | 2.76       | 0.99     | 8.24        | 48.97     | 35.17     | 61.63      | 22.83    | 65.72     |
| 100           | 20.44              | 19.45    | 0.14       | 1.35    | 0.32      | 2.54       | 0.61     | 7.29        | 22.84     | 25.12     | 35.65      | 17.94    | 39.91     |
| 110           | 53.54              | 15.20    | 0.22       | 1.44    | 0.10      | 1.15       | 0.65     | 7.50        | 27.07     | 13.17     | 31.09      | 15.19    | 34.61     |
| 120           | 81.14              | 19.07    | 0.10       | 1.59    | 0.12      | 1.26       | 0.66     | 8.61        | 28.17     | 9.84      | 30.49      | 20.09    | 36.51     |
| 130           | 141.15             | 20.07    | 0.11       | 1.58    | 0.09      | 1.19       | 0.69     | 8.86        | 27.40     | 9.83      | 29.66      | 21.29    | 36.51     |
| 140           | 234.70             | 20.58    | 0.22       | 1.52    | 0.08      | 1.20       | 0.71     | 8.66        | 26.13     | 11.09     | 28.90      | 21.76    | 36.18     |
| 150           | 311.01             | 21.10    | 0.29       | 1.44    | 0.06      | 1.32       | 0.76     | 8.19        | 23.89     | 12.91     | 27.79      | 21.95    | 35.41     |

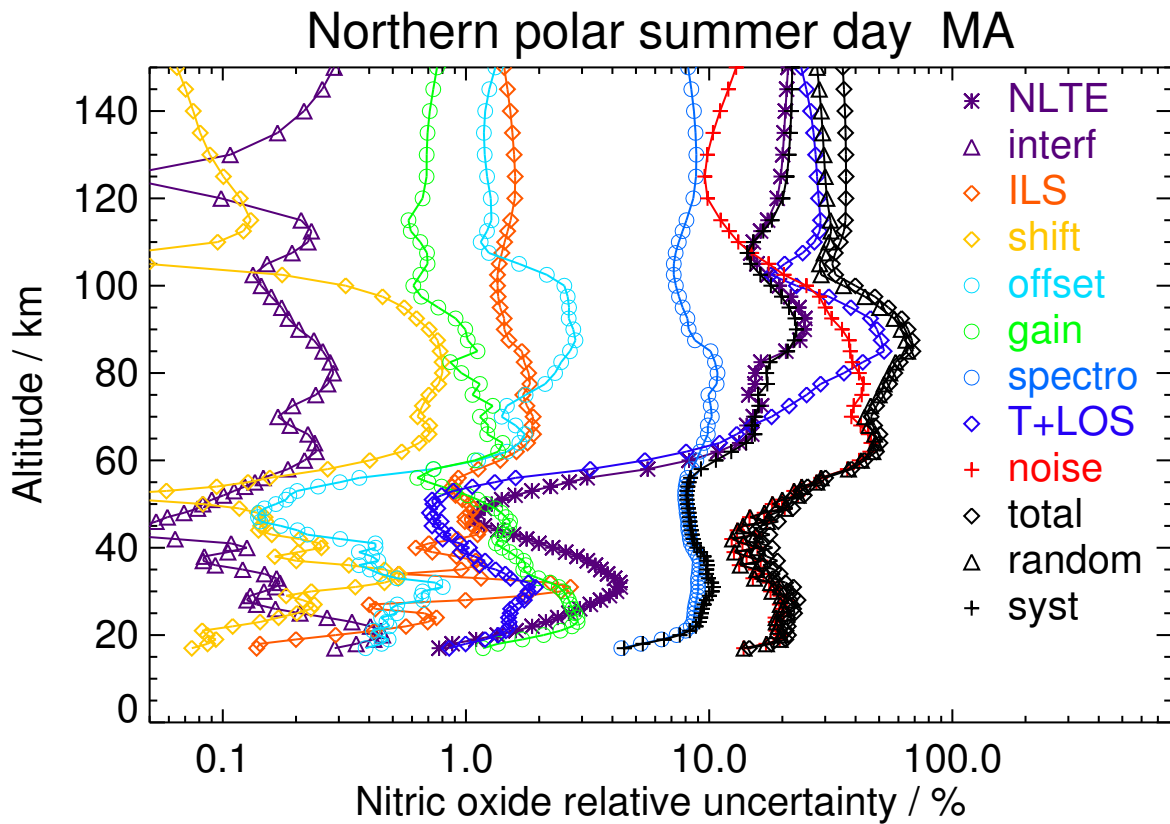

**Figure S5.** V8R\_NO\_561 Northern polar summer day

**Table S7.** Nitric oxide error budget for Northern polar summer night. All uncertainties are  $1\sigma$ .

| altitude<br>(km) | mean target<br>(ppmv) | NLTE<br>(%) | interf<br>(%) | ILS<br>(%) | shift<br>(%) | offset<br>(%) | gain<br>(%) | spectro<br>(%) | T+LOS<br>(%) | noise<br>(%) | random<br>(%) | syst<br>(%) | total<br>(%) |
|------------------|-----------------------|-------------|---------------|------------|--------------|---------------|-------------|----------------|--------------|--------------|---------------|-------------|--------------|
| 40               | 0.00                  | 6.98        | 0.73          | 0.25       | 0.05         | 0.70          | 1.63        | 1.83           | 1.56         | 44.18        | 44.74         | 2.85        | 44.84        |
| 50               | 0.00                  | 10.23       | 0.39          | 0.80       | 0.23         | 1.20          | 3.33        | 3.78           | 3.30         | 38.75        | 40.05         | 6.43        | 40.56        |
| 60               | 0.00                  | 10.91       | 0.42          | 0.89       | 0.33         | 2.09          | 1.94        | 6.71           | 8.85         | 59.72        | 60.99         | 9.96        | 61.79        |
| 90               | 0.63                  | 18.05       | 0.44          | 1.00       | 0.62         | 3.93          | 0.68        | 7.29           | 27.69        | 46.90        | 55.49         | 16.85       | 57.99        |
| 100              | 11.10                 | 17.42       | 0.32          | 1.20       | 0.39         | 3.30          | 0.75        | 7.58           | 22.25        | 32.56        | 41.07         | 15.54       | 43.92        |
| 110              | 50.20                 | 14.39       | 0.27          | 1.24       | 0.11         | 1.81          | 0.64        | 7.63           | 26.65        | 19.94        | 34.23         | 14.37       | 37.13        |
| 120              | 86.37                 | 15.10       | 0.09          | 1.21       | 0.10         | 1.22          | 0.48        | 7.35           | 24.44        | 9.46         | 26.88         | 15.79       | 31.18        |
| 130              | 101.26                | 15.97       | 0.09          | 1.26       | 0.10         | 1.36          | 0.57        | 7.07           | 20.60        | 10.01        | 23.48         | 16.80       | 28.87        |
| 140              | 131.59                | 15.88       | 0.16          | 1.27       | 0.07         | 1.29          | 0.62        | 6.71           | 18.01        | 11.21        | 21.69         | 16.75       | 27.41        |
| 150              | 160.67                | 15.63       | 0.19          | 1.23       | 0.04         | 1.33          | 0.63        | 6.21           | 15.57        | 12.58        | 20.61         | 16.21       | 26.22        |

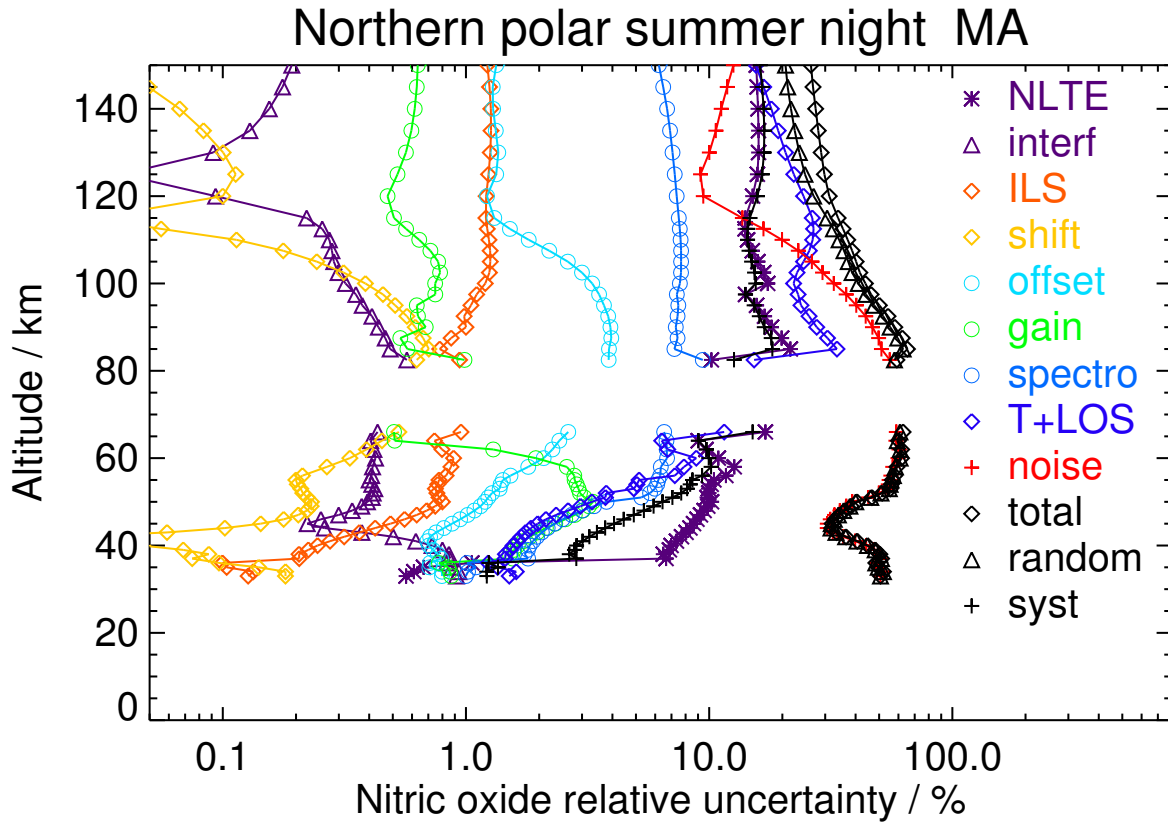**Figure S6.** V8R\_NO\_561 Northern polar summer night



**Table S8.** Nitric oxide error budget for Northern polar autumn day. All uncertainties are  $1\sigma$ .

| altitude (km) | mean target (ppmv) | NLTE (%) | interf (%) | ILS (%) | shift (%) | offset (%) | gain (%) | spectro (%) | T+LOS (%) | noise (%) | random (%) | syst (%) | total (%) |
|---------------|--------------------|----------|------------|---------|-----------|------------|----------|-------------|-----------|-----------|------------|----------|-----------|
| 20            | 0.00               | 1.99     | 0.42       | 0.12    | 0.10      | 0.47       | 1.28     | 5.10        | 0.76      | 23.11     | 23.16      | 5.51     | 23.81     |
| 30            | 0.01               | 8.57     | 0.15       | 0.76    | 0.29      | 1.01       | 3.66     | 10.56       | 1.81      | 25.59     | 25.96      | 13.56    | 29.29     |
| 40            | 0.01               | 6.22     | 0.14       | 1.73    | 0.24      | 0.85       | 1.94     | 10.62       | 1.03      | 29.04     | 29.25      | 12.17    | 31.68     |
| 50            | 0.00               | 4.80     | 0.14       | 1.55    | 0.07      | 0.72       | 1.12     | 9.32        | 1.54      | 41.13     | 41.34      | 9.93     | 42.52     |
| 60            | 0.00               | 9.46     | 0.23       | 1.57    | 0.06      | 2.20       | 0.67     | 9.42        | 2.98      | 65.92     | 66.30      | 12.03    | 67.39     |
| 70            | 0.01               | 11.83    | 0.29       | 1.69    | 0.12      | 2.45       | 0.62     | 9.91        | 5.57      | 65.99     | 66.57      | 14.17    | 68.06     |
| 80            | 0.05               | 14.93    | 0.38       | 1.68    | 0.18      | 3.19       | 0.59     | 9.55        | 7.68      | 66.49     | 67.43      | 16.17    | 69.34     |
| 90            | 0.58               | 15.74    | 0.41       | 1.51    | 0.21      | 3.85       | 0.57     | 8.76        | 13.13     | 53.28     | 55.53      | 16.43    | 57.91     |
| 100           | 4.43               | 15.56    | 0.41       | 1.33    | 0.18      | 3.88       | 0.52     | 8.19        | 22.82     | 41.21     | 47.63      | 16.65    | 50.45     |
| 110           | 28.69              | 14.24    | 0.32       | 1.42    | 0.09      | 2.48       | 0.52     | 8.37        | 26.75     | 27.84     | 38.97      | 15.91    | 42.09     |
| 120           | 46.92              | 15.69    | 0.09       | 1.53    | 0.03      | 1.04       | 0.52     | 8.62        | 21.74     | 11.37     | 24.80      | 17.64    | 30.43     |
| 130           | 75.55              | 17.46    | 0.09       | 1.52    | 0.07      | 1.33       | 0.54     | 8.45        | 18.83     | 10.75     | 22.06      | 19.09    | 29.17     |
| 140           | 109.21             | 17.76    | 0.17       | 1.47    | 0.08      | 1.47       | 0.54     | 8.12        | 16.80     | 12.77     | 21.56      | 19.15    | 28.84     |
| 150           | 141.70             | 17.26    | 0.21       | 1.38    | 0.09      | 1.52       | 0.53     | 7.58        | 14.76     | 14.16     | 20.95      | 18.42    | 27.90     |

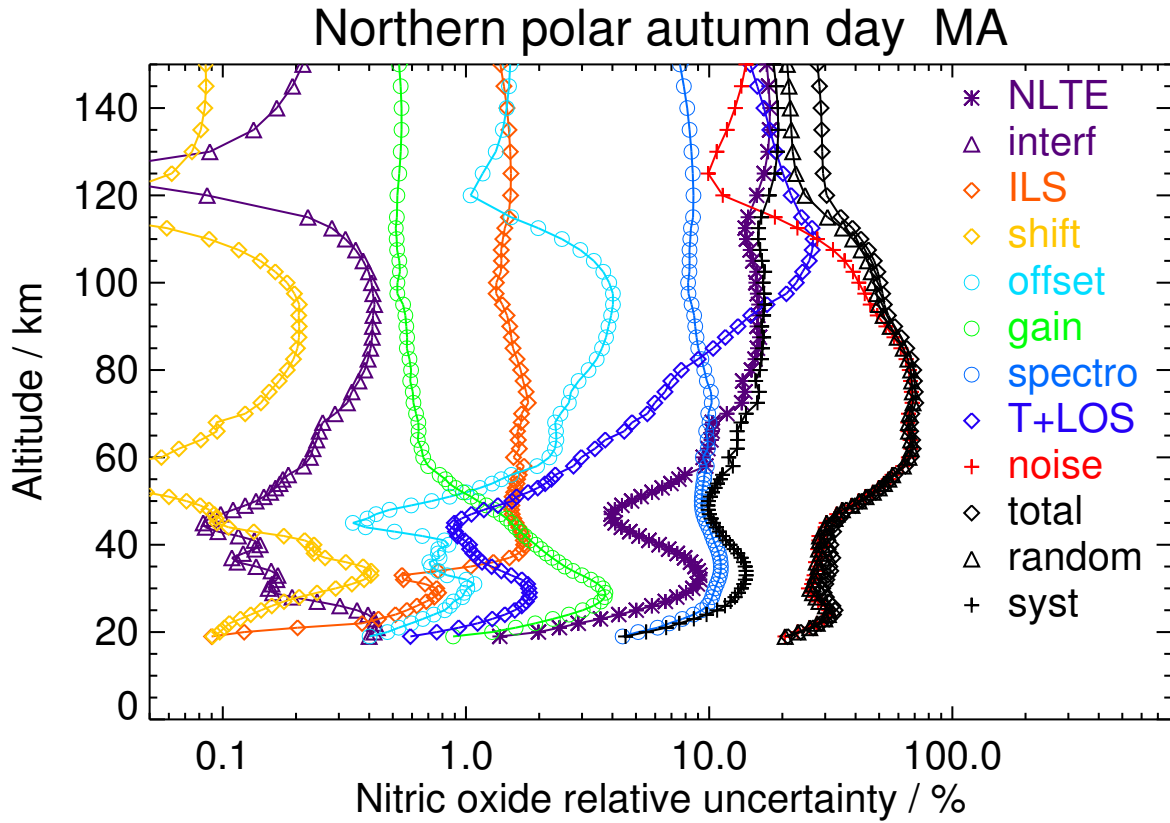

**Figure S7.** V8R\_NO\_561 Northern polar autumn day

**Table S9.** Nitric oxide error budget for Northern polar autumn night. All uncertainties are  $1\sigma$ .

| altitude<br>(km) | mean target<br>(ppmv) | NLTE<br>(%) | interf<br>(%) | ILS<br>(%) | shift<br>(%) | offset<br>(%) | gain<br>(%) | spectro<br>(%) | T+LOS<br>(%) | noise<br>(%) | random<br>(%) | syst<br>(%) | total<br>(%) |
|------------------|-----------------------|-------------|---------------|------------|--------------|---------------|-------------|----------------|--------------|--------------|---------------|-------------|--------------|
| 40               | 0.00                  | 5.33        | 0.35          | 0.80       | 0.13         | 2.40          | 0.86        | 6.27           | 2.88         | 69.03        | 69.42         | 5.36        | 69.63        |
| 50               | 0.00                  | 12.32       | 0.27          | 1.53       | 0.10         | 1.84          | 0.90        | 9.59           | 4.07         | 64.83        | 66.17         | 9.56        | 66.85        |
| 60               | 0.01                  | 14.75       | 0.26          | 1.67       | 0.05         | 2.31          | 0.87        | 10.99          | 5.22         | 60.29        | 61.99         | 12.91       | 63.32        |
| 70               | 0.04                  | 11.70       | 0.29          | 1.46       | 0.12         | 2.46          | 0.84        | 10.47          | 6.64         | 58.69        | 59.66         | 13.58       | 61.19        |
| 80               | 0.14                  | 16.36       | 0.40          | 1.34       | 0.17         | 2.74          | 0.78        | 10.58          | 8.93         | 58.89        | 60.69         | 15.94       | 62.75        |
| 90               | 1.27                  | 14.83       | 0.44          | 1.21       | 0.22         | 3.35          | 0.73        | 9.68           | 12.54        | 47.82        | 50.27         | 15.63       | 52.64        |
| 100              | 7.00                  | 15.86       | 0.40          | 1.25       | 0.18         | 3.47          | 0.64        | 9.20           | 24.75        | 38.00        | 46.00         | 17.05       | 49.06        |
| 110              | 39.70                 | 14.96       | 0.30          | 1.27       | 0.09         | 2.21          | 0.55        | 8.38           | 28.86        | 26.18        | 39.57         | 15.91       | 42.65        |
| 120              | 69.50                 | 15.99       | 0.05          | 1.44       | 0.04         | 0.99          | 0.54        | 8.50           | 25.30        | 10.74        | 28.01         | 17.40       | 32.97        |
| 130              | 83.35                 | 17.33       | 0.14          | 1.53       | 0.08         | 1.36          | 0.54        | 8.45           | 21.06        | 11.75        | 24.82         | 18.49       | 30.95        |
| 140              | 101.47                | 17.33       | 0.21          | 1.52       | 0.08         | 1.48          | 0.54        | 8.17           | 18.36        | 13.83        | 23.78         | 18.29       | 30.00        |
| 150              | 118.75                | 16.55       | 0.24          | 1.44       | 0.08         | 1.48          | 0.51        | 7.64           | 15.89        | 14.68        | 22.46         | 17.33       | 28.37        |

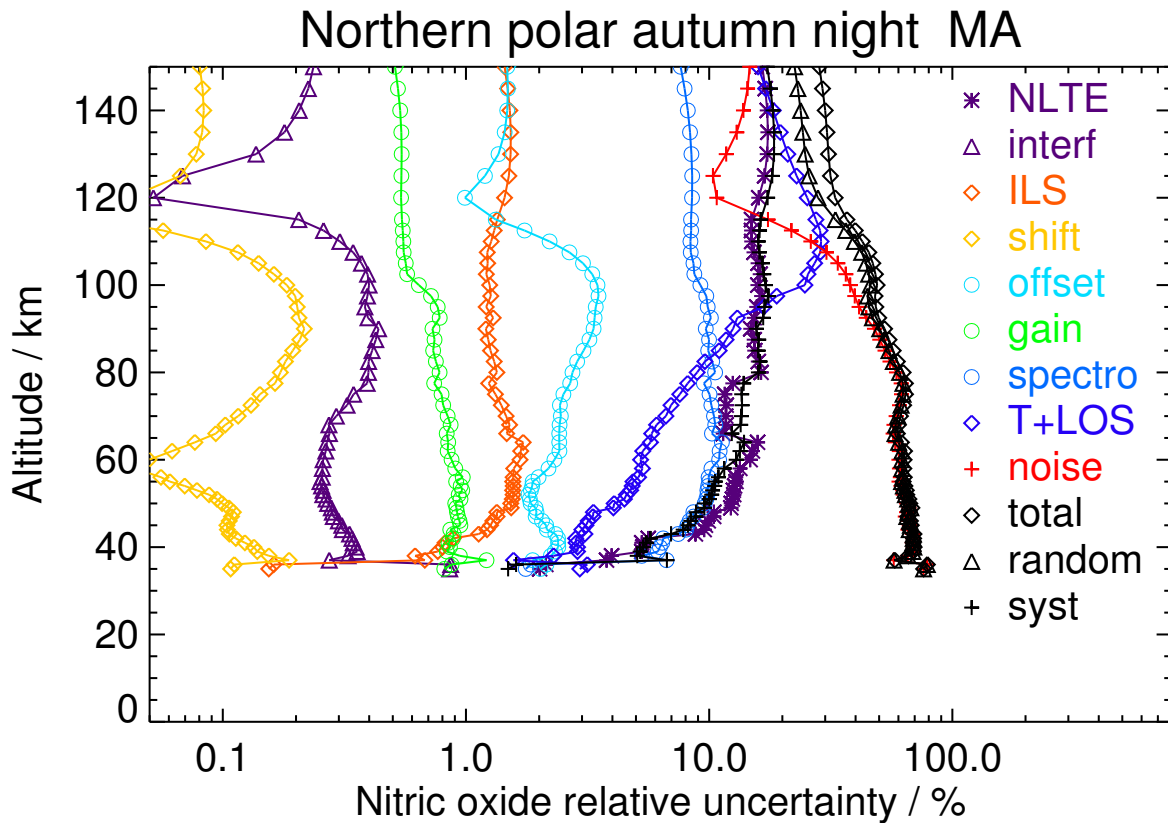**Figure S8.** V8R\_NO\_561 Northern polar autumn night

**Table S10.** Nitric oxide error budget for Northern midlatitude winter day. All uncertainties are  $1\sigma$ .

| altitude (km) | mean target (ppmv) | NLTE (%) | interf (%) | ILS (%) | shift (%) | offset (%) | gain (%) | spectro (%) | T+LOS (%) | noise (%) | random (%) | syst (%) | total (%) |
|---------------|--------------------|----------|------------|---------|-----------|------------|----------|-------------|-----------|-----------|------------|----------|-----------|
| 20            | 0.00               | 1.98     | 0.79       | 0.19    | 0.06      | 0.47       | 1.44     | 5.65        | 0.66      | 24.72     | 24.80      | 5.95     | 25.50     |
| 30            | 0.00               | 9.58     | 0.20       | 0.67    | 0.36      | 1.00       | 3.06     | 11.90       | 1.63      | 26.46     | 26.84      | 15.05    | 30.78     |
| 40            | 0.01               | 7.44     | 0.06       | 1.66    | 0.19      | 0.65       | 2.27     | 10.55       | 1.21      | 24.17     | 24.54      | 12.58    | 27.57     |
| 50            | 0.01               | 3.58     | 0.10       | 1.20    | 0.06      | 0.61       | 1.58     | 8.90        | 1.34      | 35.81     | 35.98      | 9.27     | 37.16     |
| 60            | 0.01               | 9.38     | 0.24       | 1.26    | 0.07      | 2.35       | 0.98     | 7.60        | 3.99      | 62.81     | 63.29      | 10.40    | 64.14     |
| 70            | 0.02               | 13.46    | 0.29       | 1.46    | 0.15      | 2.78       | 0.82     | 7.56        | 6.31      | 64.84     | 65.66      | 13.50    | 67.03     |
| 80            | 0.07               | 16.32    | 0.32       | 1.22    | 0.18      | 2.98       | 0.66     | 6.98        | 8.48      | 58.56     | 59.68      | 16.29    | 61.87     |
| 90            | 0.72               | 16.88    | 0.29       | 1.15    | 0.24      | 3.42       | 0.60     | 6.86        | 11.66     | 45.57     | 47.62      | 17.03    | 50.58     |
| 100           | 5.72               | 16.26    | 0.24       | 1.19    | 0.23      | 3.30       | 0.61     | 6.93        | 19.80     | 33.25     | 39.41      | 16.42    | 42.69     |
| 110           | 29.72              | 13.11    | 0.24       | 1.26    | 0.11      | 2.20       | 0.54     | 7.04        | 26.60     | 23.57     | 35.99      | 14.00    | 38.62     |
| 120           | 52.23              | 12.62    | 0.14       | 1.36    | 0.04      | 1.15       | 0.48     | 7.30        | 23.76     | 11.68     | 26.78      | 14.13    | 30.28     |
| 130           | 72.61              | 14.62    | 0.03       | 1.38    | 0.10      | 1.13       | 0.54     | 7.38        | 19.77     | 8.49      | 21.94      | 15.91    | 27.10     |
| 140           | 96.13              | 15.52    | 0.07       | 1.36    | 0.12      | 1.11       | 0.63     | 7.26        | 16.98     | 9.02      | 19.80      | 16.57    | 25.82     |
| 150           | 120.35             | 15.96    | 0.12       | 1.30    | 0.13      | 1.16       | 0.70     | 6.91        | 14.31     | 10.68     | 18.65      | 16.65    | 25.00     |

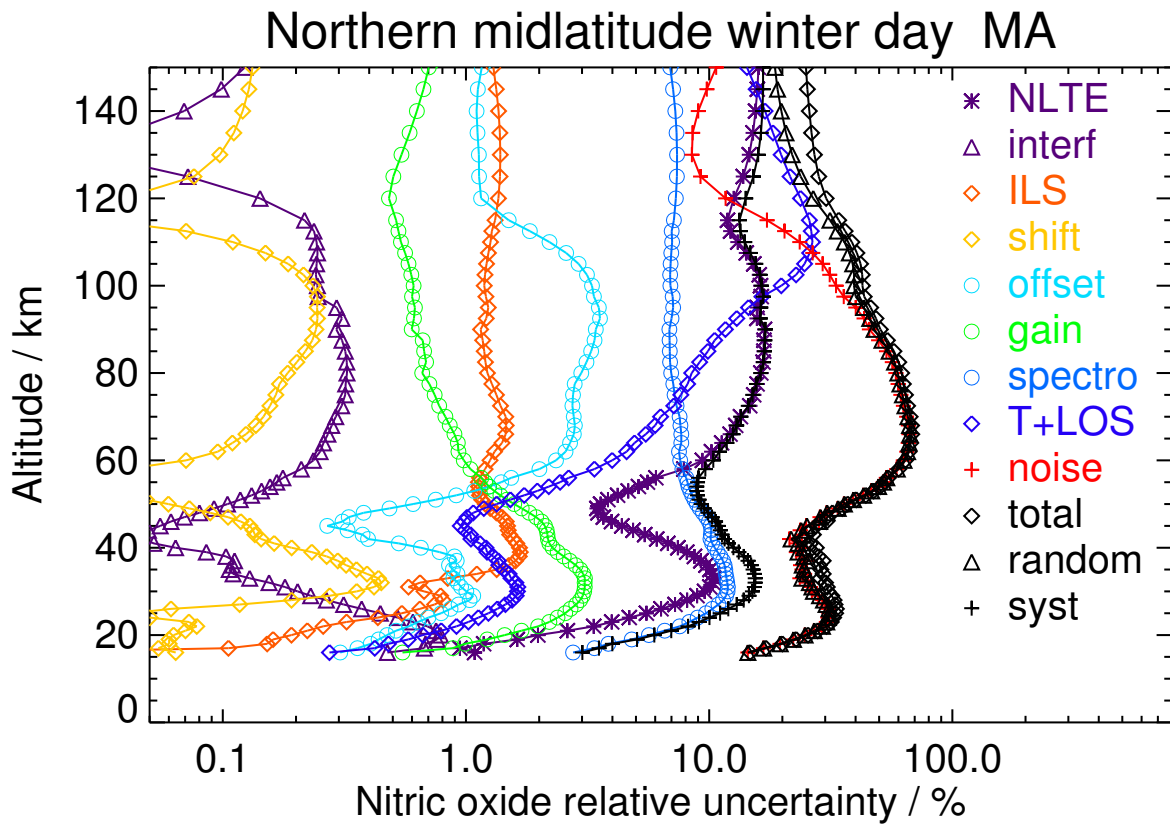

**Figure S9.** V8R\_NO\_561 Northern midlatitude winter day

**Table S11.** Nitric oxide error budget for Northern midlatitude winter night. All uncertainties are  $1\sigma$ .

| altitude (km) | mean target (ppmv) | NLTE (%) | interf (%) | ILS (%) | shift (%) | offset (%) | gain (%) | spectro (%) | T+LOS (%) | noise (%) | random (%) | syst (%) | total (%) |
|---------------|--------------------|----------|------------|---------|-----------|------------|----------|-------------|-----------|-----------|------------|----------|-----------|
| 60            | 0.00               | 5.87     | 0.39       | 0.91    | 0.15      | 3.40       | 1.72     | 6.64        | 5.75      | 87.07     | 87.57      | 6.24     | 87.80     |
| 70            | 0.02               | 4.77     | 0.33       | 0.79    | 0.17      | 2.83       | 1.04     | 7.35        | 5.04      | 69.67     | 70.04      | 7.71     | 70.47     |
| 80            | 0.16               | 12.05    | 0.34       | 0.83    | 0.48      | 2.91       | 0.52     | 5.92        | 9.44      | 64.87     | 66.53      | 7.82     | 66.99     |
| 90            | 1.30               | 11.65    | 0.25       | 0.92    | 0.41      | 3.20       | 0.52     | 6.99        | 12.84     | 46.62     | 49.50      | 9.17     | 50.34     |
| 100           | 8.93               | 11.83    | 0.23       | 0.92    | 0.32      | 3.12       | 0.55     | 7.33        | 18.89     | 33.37     | 39.27      | 11.53    | 40.92     |
| 110           | 23.75              | 9.98     | 0.20       | 0.97    | 0.11      | 1.93       | 0.75     | 6.24        | 23.60     | 21.25     | 32.19      | 10.77    | 33.94     |
| 120           | 38.76              | 10.40    | 0.08       | 1.05    | 0.05      | 1.19       | 0.50     | 5.86        | 20.72     | 11.52     | 24.03      | 11.40    | 26.59     |
| 130           | 31.41              | 10.57    | 0.11       | 1.06    | 0.06      | 1.39       | 0.49     | 5.59        | 18.26     | 13.12     | 22.85      | 11.39    | 25.53     |
| 140           | 31.51              | 10.44    | 0.20       | 1.04    | 0.06      | 1.59       | 0.51     | 5.33        | 16.57     | 15.48     | 23.10      | 11.03    | 25.60     |
| 150           | 33.27              | 9.99     | 0.24       | 0.98    | 0.06      | 1.67       | 0.50     | 4.94        | 14.82     | 16.43     | 22.60      | 10.34    | 24.86     |

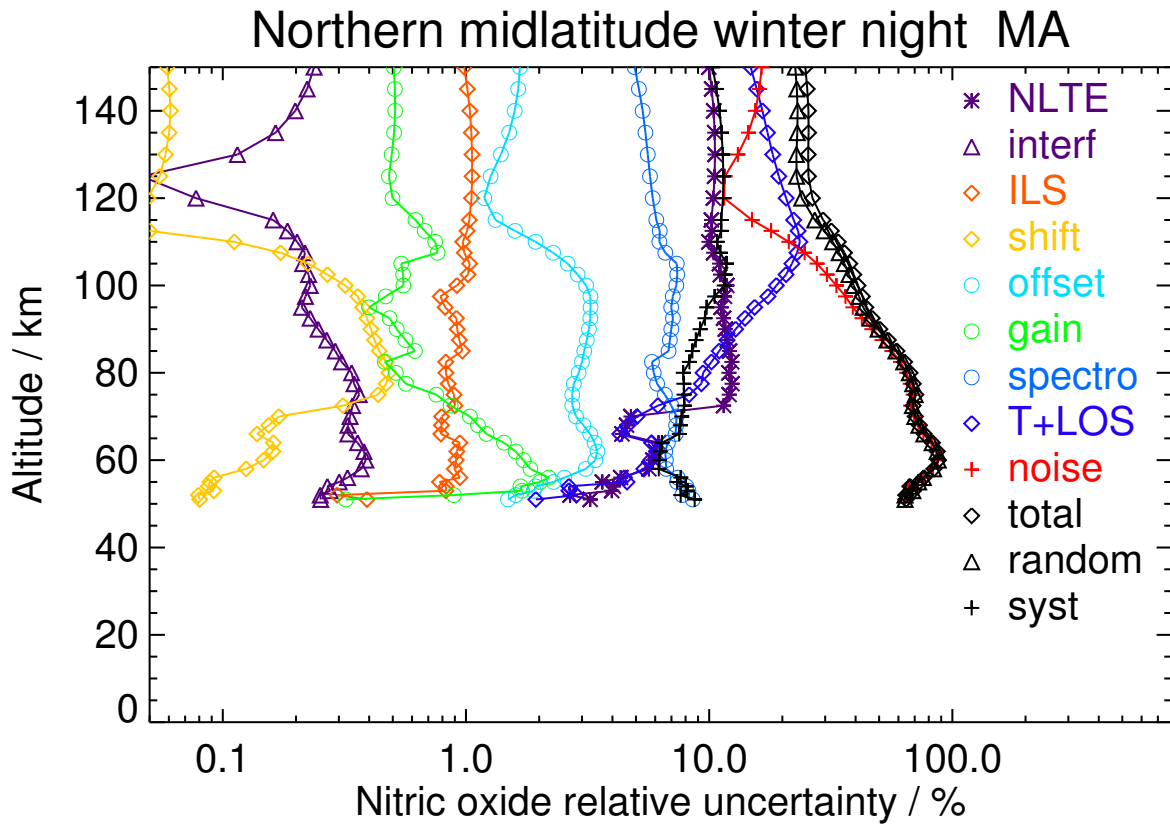

**Figure S10.** V8R\_NO\_561 Northern midlatitude winter night

**Table S12.** Nitric oxide error budget for Northern midlatitude spring day. All uncertainties are  $1\sigma$ .

| altitude (km) | mean target (ppmv) | NLTE (%) | interf (%) | ILS (%) | shift (%) | offset (%) | gain (%) | spectro (%) | T+LOS (%) | noise (%) | random (%) | syst (%) | total (%) |
|---------------|--------------------|----------|------------|---------|-----------|------------|----------|-------------|-----------|-----------|------------|----------|-----------|
| 20            | 0.00               | 2.13     | 0.37       | 0.25    | 0.09      | 0.50       | 1.47     | 5.62        | 0.97      | 24.50     | 24.58      | 6.00     | 25.30     |
| 30            | 0.00               | 12.04    | 0.17       | 1.56    | 0.32      | 1.06       | 3.52     | 13.05       | 1.92      | 25.00     | 25.42      | 17.71    | 30.98     |
| 40            | 0.01               | 4.60     | 0.11       | 0.92    | 0.30      | 0.57       | 1.92     | 9.73        | 1.11      | 17.33     | 17.63      | 10.56    | 20.55     |
| 50            | 0.01               | 1.82     | 0.08       | 1.14    | 0.06      | 0.27       | 1.43     | 8.68        | 0.94      | 23.05     | 23.21      | 8.70     | 24.79     |
| 60            | 0.01               | 10.62    | 0.24       | 1.38    | 0.16      | 2.00       | 0.63     | 7.71        | 4.39      | 57.23     | 57.79      | 11.53    | 58.93     |
| 70            | 0.02               | 11.54    | 0.21       | 1.36    | 0.15      | 1.74       | 0.78     | 7.51        | 5.64      | 49.01     | 49.82      | 12.15    | 51.28     |
| 80            | 0.04               | 19.43    | 0.37       | 1.42    | 0.37      | 3.27       | 0.88     | 7.28        | 10.59     | 59.96     | 62.04      | 17.41    | 64.44     |
| 90            | 0.38               | 26.56    | 0.46       | 1.51    | 0.49      | 4.39       | 1.02     | 7.11        | 14.51     | 55.72     | 59.29      | 24.06    | 63.99     |
| 100           | 3.13               | 25.54    | 0.38       | 1.52    | 0.43      | 4.05       | 0.93     | 7.43        | 17.90     | 41.83     | 47.48      | 23.31    | 52.90     |
| 110           | 20.18              | 19.16    | 0.35       | 1.57    | 0.25      | 2.66       | 0.84     | 7.62        | 20.98     | 28.47     | 36.41      | 18.99    | 41.06     |
| 120           | 46.71              | 15.65    | 0.21       | 1.49    | 0.04      | 1.26       | 0.51     | 7.80        | 21.47     | 13.42     | 25.90      | 16.74    | 30.84     |
| 130           | 85.67              | 16.07    | 0.06       | 1.40    | 0.12      | 1.04       | 0.54     | 7.74        | 19.82     | 7.88      | 21.91      | 17.22    | 27.86     |
| 140           | 141.22             | 16.01    | 0.05       | 1.32    | 0.15      | 0.93       | 0.69     | 7.55        | 17.89     | 7.44      | 19.70      | 17.43    | 26.31     |
| 150           | 190.28             | 16.19    | 0.11       | 1.23    | 0.17      | 0.99       | 0.83     | 7.15        | 15.59     | 9.17      | 18.43      | 17.44    | 25.37     |

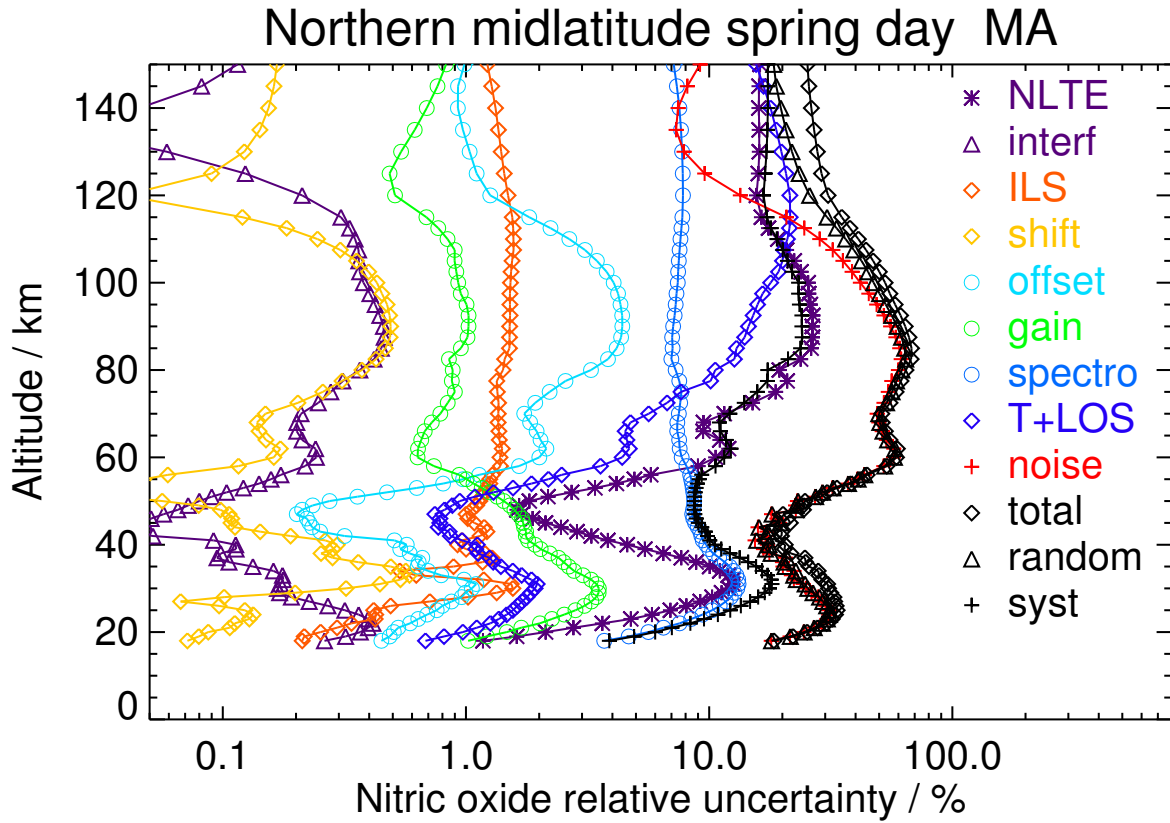

**Figure S11.** V8R\_NO\_561 Northern midlatitude spring day

**Table S13.** Nitric oxide error budget for Northern midlatitude spring night. All uncertainties are  $1\sigma$ .

| altitude (km) | mean target (ppmv) | NLTE (%) | interf (%) | ILS (%) | shift (%) | offset (%) | gain (%) | spectro (%) | T+LOS (%) | noise (%) | random (%) | syst (%) | total (%) |
|---------------|--------------------|----------|------------|---------|-----------|------------|----------|-------------|-----------|-----------|------------|----------|-----------|
| 60            | 0.00               | 10.30    | 0.43       | 0.93    | 0.20      | 2.55       | 2.17     | 6.57        | 5.21      | 67.94     | 68.80      | 8.37     | 69.31     |
| 70            | 0.04               | 4.51     | 0.19       | 0.69    | 0.14      | 2.23       | 0.62     | 8.07        | 3.93      | 48.70     | 49.07      | 8.41     | 49.78     |
| 80            | 0.08               | 12.62    | 0.34       | 0.84    | 0.28      | 1.96       | 0.72     | 7.44        | 9.66      | 45.52     | 47.51      | 11.32    | 48.84     |
| 90            | 0.47               | 14.27    | 0.62       | 1.04    | 0.48      | 3.84       | 0.62     | 7.98        | 13.85     | 55.89     | 58.48      | 13.41    | 60.00     |
| 100           | 3.52               | 17.35    | 0.46       | 1.13    | 0.37      | 3.75       | 0.47     | 8.62        | 17.48     | 40.32     | 45.36      | 16.28    | 48.20     |
| 110           | 23.93              | 15.74    | 0.34       | 1.27    | 0.16      | 2.33       | 0.54     | 8.33        | 21.39     | 26.47     | 34.91      | 16.26    | 38.51     |
| 120           | 56.89              | 13.89    | 0.11       | 1.26    | 0.06      | 1.19       | 0.46     | 7.52        | 20.50     | 12.94     | 24.64      | 15.28    | 28.99     |
| 130           | 75.24              | 13.76    | 0.08       | 1.25    | 0.09      | 1.22       | 0.50     | 7.03        | 18.91     | 10.35     | 21.94      | 15.02    | 26.59     |
| 140           | 93.09              | 13.54    | 0.18       | 1.23    | 0.09      | 1.32       | 0.53     | 6.63        | 17.35     | 12.43     | 21.81      | 14.52    | 26.20     |
| 150           | 103.91             | 13.02    | 0.24       | 1.17    | 0.08      | 1.44       | 0.53     | 6.11        | 15.56     | 14.09     | 21.57      | 13.64    | 25.52     |

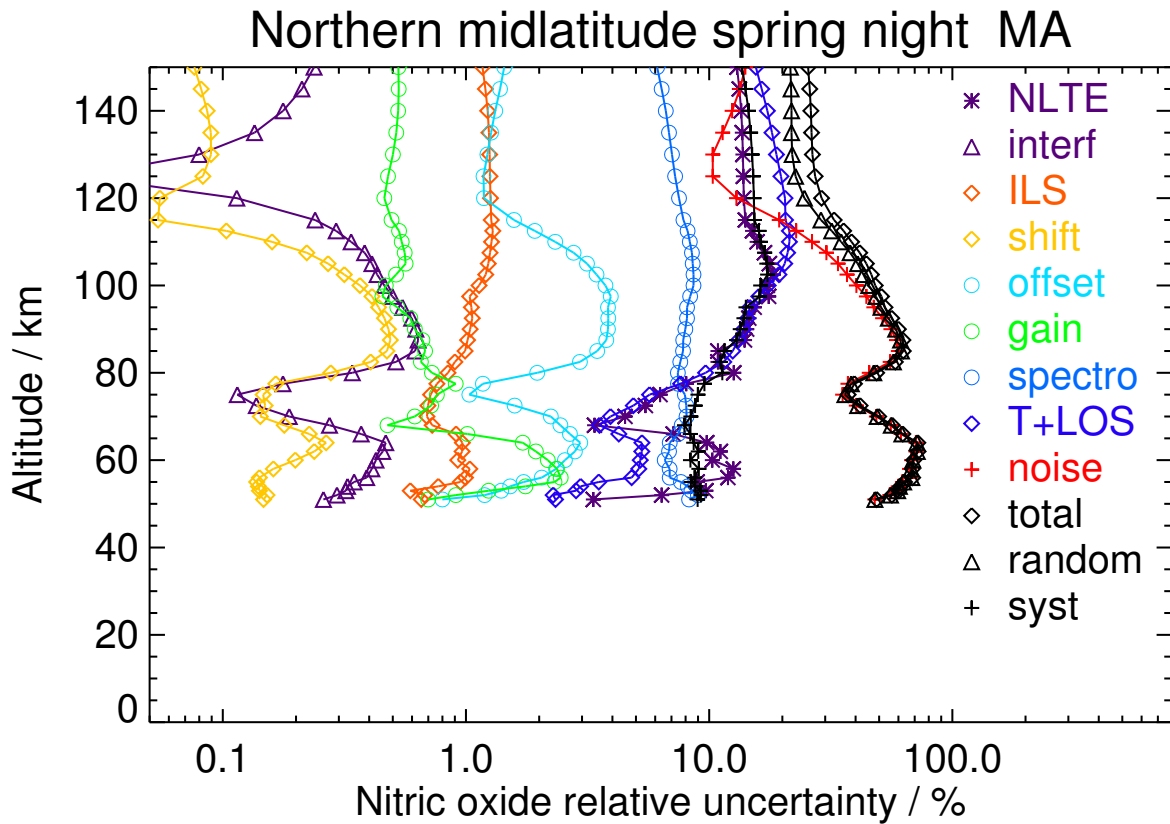

**Figure S12.** V8R\_NO\_561 Northern midlatitude spring night

**Table S14.** Nitric oxide error budget for Northern midlatitude summer day. All uncertainties are  $1\sigma$ .

| altitude (km) | mean target (ppmv) | NLTE (%) | interf (%) | ILS (%) | shift (%) | offset (%) | gain (%) | spectro (%) | T+LOS (%) | noise (%) | random (%) | syst (%) | total (%) |
|---------------|--------------------|----------|------------|---------|-----------|------------|----------|-------------|-----------|-----------|------------|----------|-----------|
| 20            | 0.00               | 1.49     | 0.43       | 0.35    | 0.10      | 0.46       | 1.79     | 6.53        | 1.06      | 23.70     | 23.78      | 6.78     | 24.73     |
| 30            | 0.01               | 8.28     | 0.16       | 2.06    | 0.26      | 0.85       | 3.56     | 11.76       | 1.87      | 20.49     | 20.76      | 14.72    | 25.45     |
| 40            | 0.01               | 3.59     | 0.12       | 0.69    | 0.25      | 0.50       | 1.76     | 9.27        | 1.07      | 16.94     | 17.05      | 10.01    | 19.77     |
| 50            | 0.01               | 1.40     | 0.07       | 0.86    | 0.05      | 0.25       | 1.40     | 8.22        | 0.74      | 20.11     | 20.20      | 8.31     | 21.85     |
| 60            | 0.01               | 8.33     | 0.28       | 1.22    | 0.22      | 1.89       | 0.65     | 7.89        | 5.28      | 55.09     | 55.62      | 10.35    | 56.57     |
| 70            | 0.01               | 16.69    | 0.41       | 2.17    | 0.48      | 2.80       | 1.14     | 10.69       | 24.09     | 62.53     | 67.57      | 18.24    | 69.99     |
| 80            | 0.02               | 16.57    | 0.37       | 1.43    | 0.40      | 3.09       | 0.57     | 7.96        | 24.76     | 53.24     | 59.45      | 16.21    | 61.63     |
| 90            | 0.84               | 18.97    | 0.36       | 1.41    | 0.52      | 3.65       | 0.82     | 6.87        | 21.01     | 45.77     | 51.16      | 18.50    | 54.40     |
| 100           | 9.52               | 16.41    | 0.34       | 1.40    | 0.45      | 3.24       | 0.87     | 6.74        | 19.87     | 32.80     | 39.11      | 16.44    | 42.42     |
| 110           | 34.32              | 13.85    | 0.39       | 1.50    | 0.20      | 1.97       | 0.70     | 7.13        | 26.24     | 22.51     | 35.00      | 14.82    | 38.01     |
| 120           | 60.42              | 17.68    | 0.19       | 1.43    | 0.13      | 1.12       | 0.53     | 7.61        | 24.22     | 9.35      | 26.36      | 18.80    | 32.38     |
| 130           | 108.14             | 20.77    | 0.05       | 1.35    | 0.23      | 1.14       | 0.85     | 7.72        | 20.93     | 8.26      | 23.15      | 21.56    | 31.64     |
| 140           | 177.11             | 21.82    | 0.16       | 1.28    | 0.25      | 1.21       | 1.03     | 7.58        | 18.54     | 10.34     | 22.09      | 22.38    | 31.44     |
| 150           | 236.45             | 21.96    | 0.24       | 1.20    | 0.25      | 1.30       | 1.14     | 7.20        | 16.04     | 12.40     | 21.29      | 22.28    | 30.82     |

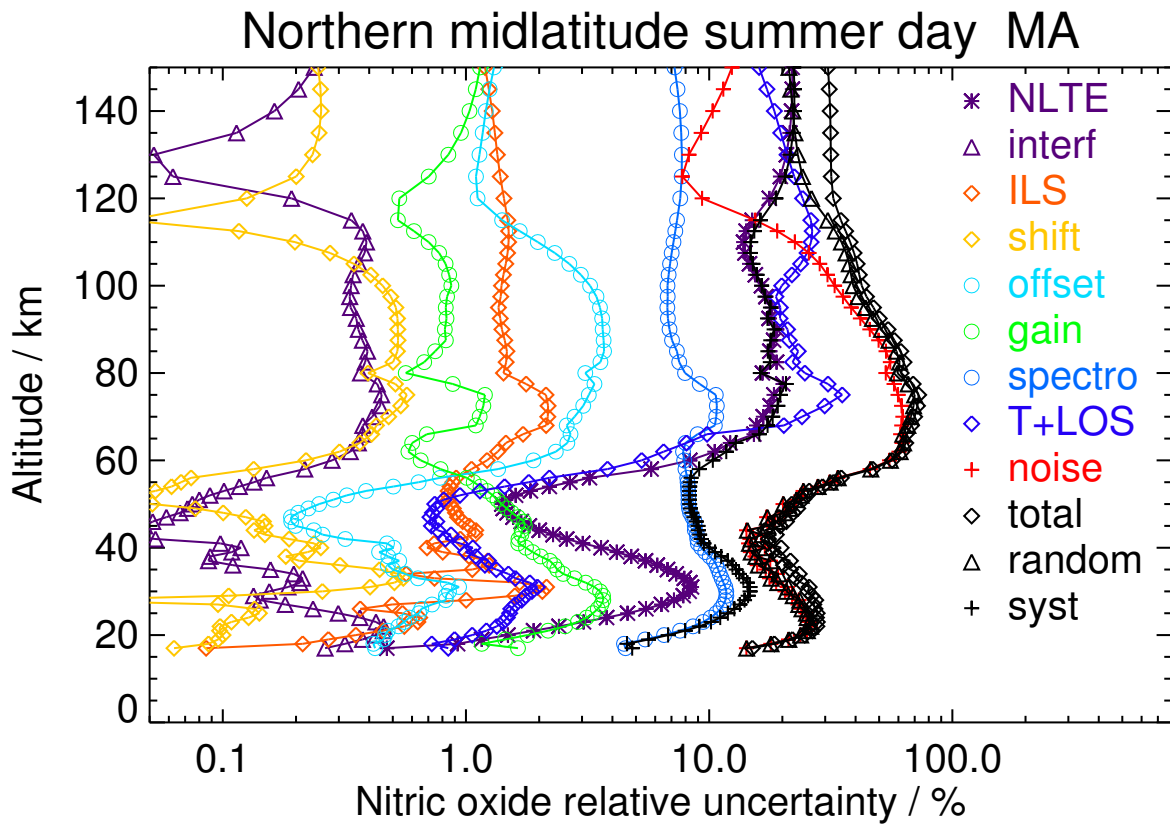

**Figure S13.** V8R\_NO\_561 Northern midlatitude summer day

**Table S15.** Nitric oxide error budget for Northern midlatitude summer night. All uncertainties are  $1\sigma$ .

| altitude (km) | mean target (ppmv) | NLTE (%) | interf (%) | ILS (%) | shift (%) | offset (%) | gain (%) | spectro (%) | T+LOS (%) | noise (%) | random (%) | syst (%) | total (%) |
|---------------|--------------------|----------|------------|---------|-----------|------------|----------|-------------|-----------|-----------|------------|----------|-----------|
| 40            | 0.00               | 1.16     | 0.63       | 0.12    | 0.09      | 0.52       | 0.47     | 0.81        | 1.33      | 38.10     | 38.15      | 1.11     | 38.16     |
| 50            | 0.00               | 3.47     | 0.38       | 0.42    | 0.27      | 1.02       | 2.66     | 2.92        | 2.23      | 34.34     | 34.57      | 4.28     | 34.83     |
| 60            | 0.00               | 5.39     | 0.49       | 0.94    | 0.32      | 2.20       | 2.04     | 6.44        | 3.75      | 61.57     | 61.96      | 6.84     | 62.34     |
| 70            | 0.01               | 7.09     | 0.64       | 0.98    | 0.65      | 2.63       | 0.45     | 6.22        | 6.70      | 60.30     | 60.94      | 8.14     | 61.48     |
| 80            | 0.04               | 10.81    | 0.72       | 1.04    | 0.85      | 3.07       | 0.44     | 6.23        | 16.83     | 54.71     | 57.71      | 10.71    | 58.69     |
| 90            | 1.11               | 10.28    | 0.65       | 1.30    | 0.74      | 3.54       | 0.72     | 7.62        | 17.83     | 46.31     | 50.20      | 11.06    | 51.40     |
| 100           | 9.27               | 12.84    | 0.57       | 1.49    | 0.51      | 3.12       | 1.11     | 7.91        | 19.85     | 31.64     | 37.85      | 14.30    | 40.46     |
| 110           | 27.36              | 15.27    | 0.41       | 1.41    | 0.14      | 1.63       | 0.70     | 7.99        | 24.58     | 18.26     | 30.85      | 16.98    | 35.21     |
| 120           | 44.30              | 17.69    | 0.07       | 1.27    | 0.14      | 1.30       | 0.57     | 7.48        | 24.53     | 10.35     | 26.90      | 18.91    | 32.88     |
| 130           | 55.02              | 17.94    | 0.35       | 1.22    | 0.18      | 1.82       | 0.79     | 6.90        | 22.22     | 15.27     | 27.39      | 18.75    | 33.19     |
| 140           | 71.41              | 17.24    | 0.43       | 1.18    | 0.17      | 1.89       | 0.84     | 6.41        | 20.22     | 16.87     | 26.81      | 17.86    | 32.21     |
| 150           | 84.75              | 16.07    | 0.45       | 1.11    | 0.15      | 1.83       | 0.84     | 5.84        | 18.06     | 17.03     | 25.31      | 16.53    | 30.23     |

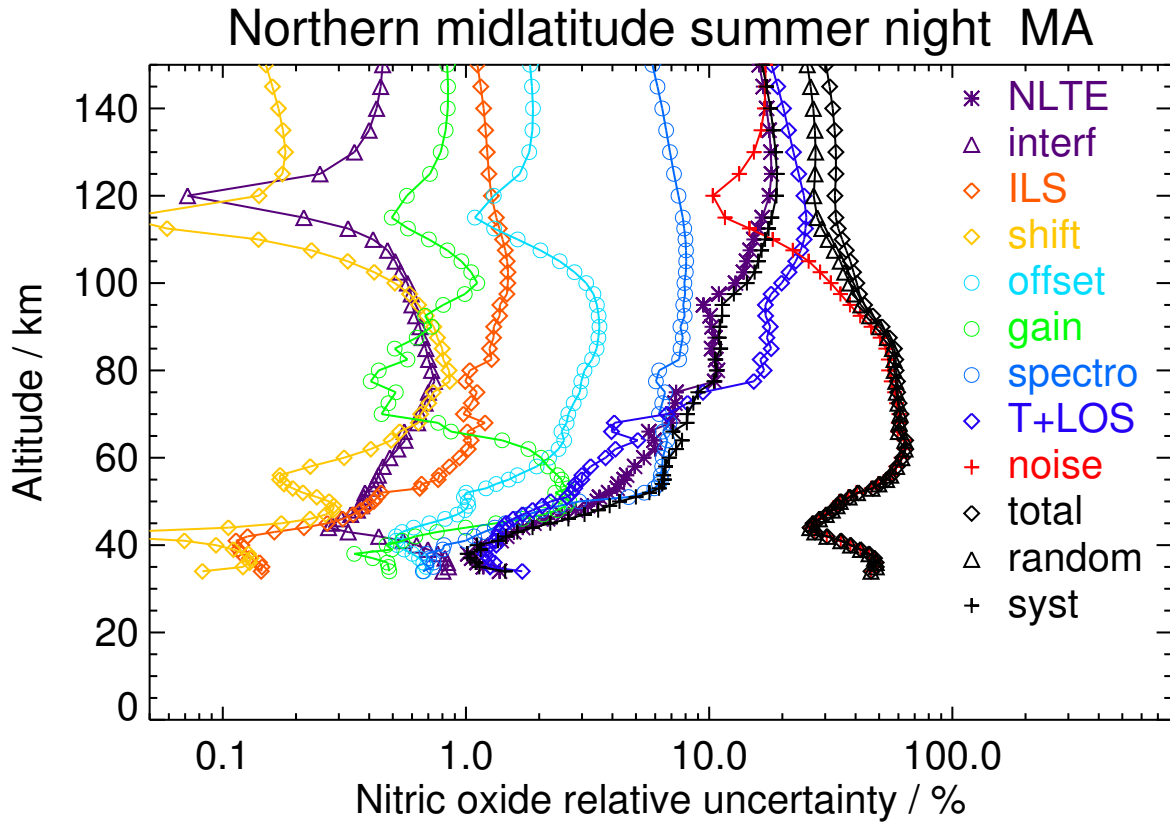

**Figure S14.** V8R\_NO\_561 Northern midlatitude summer night



**Table S16.** Nitric oxide error budget for Northern midlatitude autumn day. All uncertainties are  $1\sigma$ .

| altitude (km) | mean target (ppmv) | NLTE (%) | interf (%) | ILS (%) | shift (%) | offset (%) | gain (%) | spectro (%) | T+LOS (%) | noise (%) | random (%) | syst (%) | total (%) |
|---------------|--------------------|----------|------------|---------|-----------|------------|----------|-------------|-----------|-----------|------------|----------|-----------|
| 20            | 0.00               | 1.67     | 0.35       | 0.10    | 0.12      | 0.46       | 1.01     | 4.75        | 0.79      | 24.33     | 24.39      | 4.96     | 24.89     |
| 30            | 0.01               | 9.79     | 0.16       | 1.68    | 0.32      | 1.01       | 3.56     | 11.60       | 1.96      | 24.93     | 25.23      | 15.36    | 29.54     |
| 40            | 0.01               | 5.86     | 0.10       | 1.26    | 0.33      | 0.67       | 2.21     | 10.05       | 1.31      | 19.54     | 19.77      | 11.62    | 22.93     |
| 50            | 0.01               | 1.98     | 0.07       | 1.22    | 0.07      | 0.33       | 1.52     | 8.95        | 0.93      | 25.29     | 25.43      | 9.03     | 26.99     |
| 60            | 0.00               | 7.16     | 0.17       | 1.43    | 0.11      | 2.06       | 0.67     | 8.67        | 2.90      | 60.35     | 60.72      | 9.79     | 61.51     |
| 70            | 0.01               | 11.61    | 0.22       | 1.69    | 0.18      | 2.55       | 0.61     | 9.45        | 5.29      | 64.09     | 64.99      | 12.08    | 66.10     |
| 80            | 0.04               | 12.68    | 0.33       | 1.55    | 0.29      | 3.44       | 0.67     | 8.22        | 7.74      | 67.94     | 68.91      | 13.05    | 70.14     |
| 90            | 0.50               | 14.52    | 0.33       | 1.59    | 0.29      | 3.82       | 0.76     | 8.27        | 11.56     | 55.59     | 57.49      | 14.70    | 59.34     |
| 100           | 3.92               | 15.64    | 0.27       | 1.52    | 0.24      | 3.48       | 0.67     | 8.15        | 21.15     | 37.79     | 44.18      | 15.80    | 46.92     |
| 110           | 21.47              | 15.26    | 0.27       | 1.54    | 0.15      | 2.70       | 0.60     | 8.14        | 22.62     | 30.11     | 38.24      | 16.29    | 41.57     |
| 120           | 27.38              | 13.08    | 0.12       | 1.41    | 0.01      | 1.18       | 0.47     | 7.71        | 19.62     | 14.33     | 24.68      | 14.67    | 28.71     |
| 130           | 50.35              | 13.92    | 0.02       | 1.32    | 0.09      | 1.09       | 0.53     | 7.47        | 18.50     | 9.72      | 21.38      | 15.25    | 26.26     |
| 140           | 81.36              | 14.18    | 0.08       | 1.25    | 0.12      | 1.24       | 0.60     | 7.20        | 17.21     | 10.79     | 20.87      | 15.28    | 25.87     |
| 150           | 112.02             | 13.92    | 0.13       | 1.16    | 0.14      | 1.36       | 0.65     | 6.75        | 15.58     | 12.62     | 20.64      | 14.80    | 25.39     |

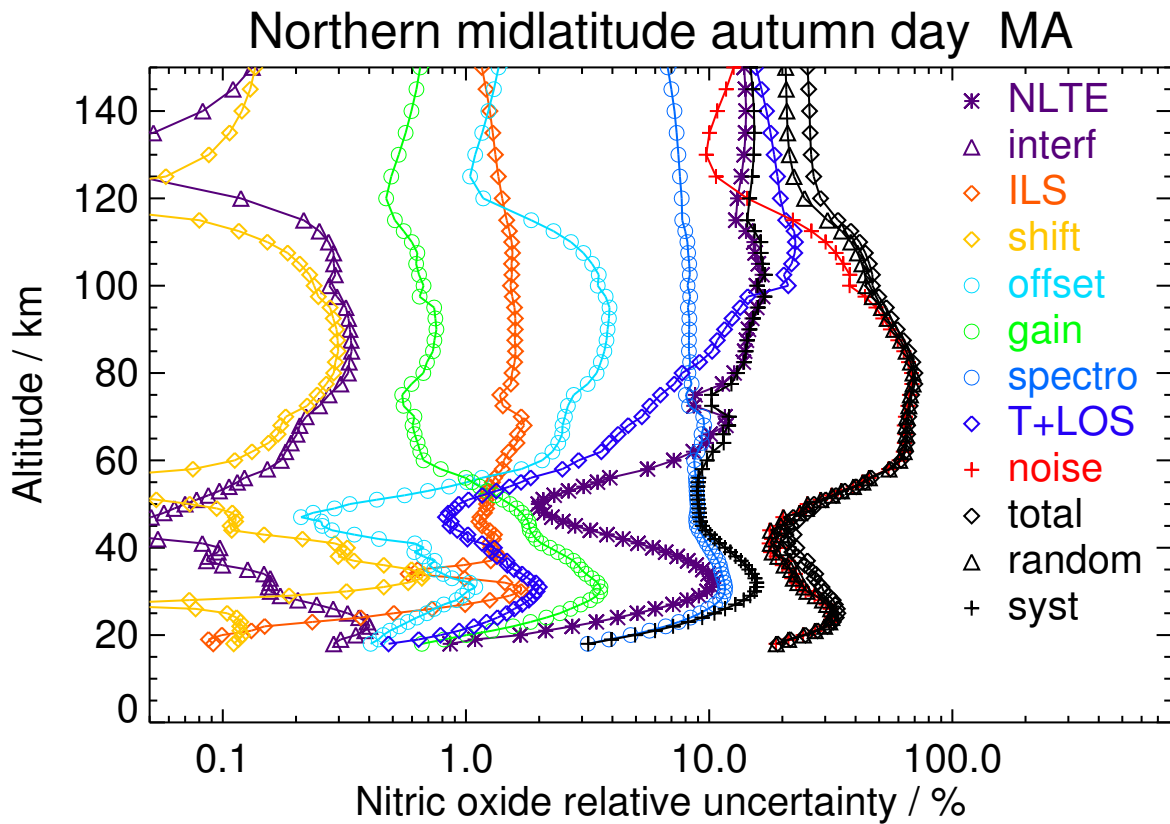

**Figure S15.** V8R\_NO\_561 Northern midlatitude autumn day

**Table S17.** Nitric oxide error budget for Northern midlatitude autumn night. All uncertainties are  $1\sigma$ .

| altitude (km) | mean target (ppmv) | NLTE (%) | interf (%) | ILS (%) | shift (%) | offset (%) | gain (%) | spectro (%) | T+LOS (%) | noise (%) | random (%) | syst (%) | total (%) |
|---------------|--------------------|----------|------------|---------|-----------|------------|----------|-------------|-----------|-----------|------------|----------|-----------|
| 50            | 0.00               | 6.63     | 0.37       | 0.62    | 0.25      | 1.36       | 0.80     | 10.23       | 1.34      | 66.20     | 66.23      | 12.23    | 67.35     |
| 60            | 0.00               | 5.54     | 0.33       | 1.17    | 0.13      | 2.28       | 1.72     | 8.63        | 7.91      | 77.26     | 77.78      | 9.82     | 78.40     |
| 70            | 0.06               | 4.80     | 0.06       | 0.75    | 0.10      | 1.19       | 0.92     | 8.41        | 5.57      | 33.51     | 34.17      | 9.10     | 35.36     |
| 80            | 0.06               | 7.68     | 0.23       | 1.02    | 0.19      | 2.28       | 0.70     | 8.17        | 12.35     | 55.71     | 57.30      | 10.28    | 58.21     |
| 90            | 0.38               | 9.79     | 0.30       | 1.31    | 0.20      | 2.93       | 0.73     | 8.41        | 17.44     | 49.10     | 52.41      | 12.04    | 53.78     |
| 100           | 2.32               | 7.39     | 0.19       | 1.48    | 0.09      | 2.56       | 0.42     | 9.36        | 33.14     | 35.76     | 48.83      | 12.02    | 50.28     |
| 110           | 9.21               | 10.46    | 0.14       | 1.30    | 0.07      | 1.86       | 0.66     | 7.65        | 23.55     | 25.49     | 34.92      | 12.57    | 37.11     |
| 120           | 13.98              | 11.76    | 0.12       | 1.33    | 0.10      | 1.98       | 0.57     | 6.93        | 16.00     | 25.81     | 30.68      | 13.16    | 33.39     |
| 130           | 19.18              | 11.19    | 0.17       | 1.24    | 0.13      | 2.06       | 0.51     | 6.40        | 14.75     | 24.03     | 28.51      | 12.44    | 31.10     |
| 140           | 25.30              | 10.62    | 0.20       | 1.18    | 0.13      | 2.06       | 0.48     | 6.00        | 13.72     | 23.28     | 27.32      | 11.77    | 29.75     |
| 150           | 30.46              | 9.82     | 0.20       | 1.09    | 0.12      | 1.98       | 0.44     | 5.50        | 12.46     | 22.00     | 25.56      | 10.86    | 27.77     |

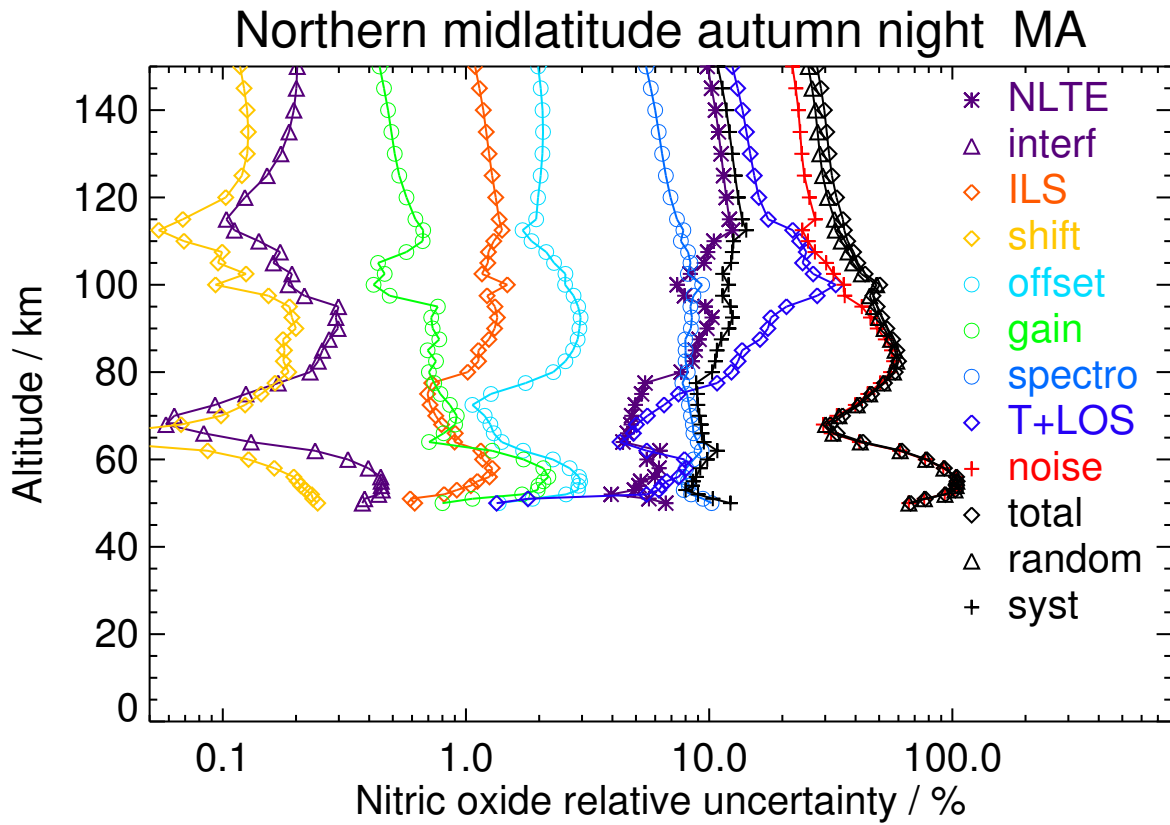

**Figure S16.** V8R\_NO\_561 Northern midlatitude autumn night

**Table S18.** Nitric oxide error budget for Tropics day. All uncertainties are  $1\sigma$ .

| altitude (km) | mean target (ppmv) | NLTE (%) | interf (%) | ILS (%) | shift (%) | offset (%) | gain (%) | spectro (%) | T+LOS (%) | noise (%) | random (%) | syst (%) | total (%) |
|---------------|--------------------|----------|------------|---------|-----------|------------|----------|-------------|-----------|-----------|------------|----------|-----------|
| 20            | 0.00               | 2.61     | 0.10       | 1.18    | 0.04      | 0.80       | 0.25     | 3.26        | 0.56      | 23.41     | 23.49      | 3.99     | 23.83     |
| 30            | 0.00               | 10.04    | 0.17       | 2.80    | 0.20      | 0.93       | 1.53     | 12.22       | 1.83      | 29.96     | 30.21      | 15.79    | 34.09     |
| 40            | 0.01               | 4.27     | 0.09       | 0.74    | 0.34      | 0.52       | 2.00     | 9.28        | 1.30      | 13.80     | 14.03      | 10.22    | 17.36     |
| 50            | 0.01               | 1.28     | 0.07       | 1.27    | 0.06      | 0.20       | 1.50     | 8.89        | 0.77      | 19.87     | 19.96      | 9.02     | 21.90     |
| 60            | 0.00               | 8.82     | 0.17       | 1.92    | 0.29      | 2.31       | 0.40     | 8.91        | 2.55      | 62.86     | 63.10      | 11.94    | 64.22     |
| 70            | 0.01               | 11.10    | 0.19       | 2.31    | 0.40      | 3.05       | 0.63     | 9.71        | 4.61      | 65.30     | 65.70      | 14.20    | 67.22     |
| 80            | 0.02               | 13.41    | 0.23       | 2.35    | 0.49      | 3.84       | 1.01     | 8.95        | 7.53      | 61.37     | 62.11      | 15.72    | 64.07     |
| 90            | 0.38               | 18.32    | 0.25       | 2.30    | 0.54      | 4.48       | 1.24     | 8.53        | 18.38     | 54.59     | 58.14      | 19.30    | 61.26     |
| 100           | 3.87               | 18.53    | 0.25       | 2.20    | 0.49      | 4.24       | 1.20     | 8.37        | 26.33     | 44.93     | 52.72      | 19.25    | 56.12     |
| 110           | 16.35              | 14.96    | 0.21       | 2.10    | 0.30      | 2.79       | 0.91     | 8.58        | 27.67     | 30.61     | 41.71      | 16.53    | 44.87     |
| 120           | 26.08              | 14.25    | 0.09       | 1.84    | 0.03      | 1.07       | 0.54     | 8.83        | 21.18     | 11.63     | 24.40      | 16.57    | 29.50     |
| 130           | 51.20              | 16.17    | 0.03       | 1.62    | 0.14      | 1.15       | 0.60     | 8.70        | 17.37     | 8.21      | 19.41      | 18.28    | 26.66     |
| 140           | 87.67              | 16.74    | 0.07       | 1.49    | 0.17      | 1.24       | 0.69     | 8.38        | 15.06     | 9.60      | 18.05      | 18.65    | 25.96     |
| 150           | 117.41             | 16.55    | 0.10       | 1.35    | 0.18      | 1.27       | 0.74     | 7.82        | 12.91     | 11.24     | 17.32      | 18.21    | 25.14     |

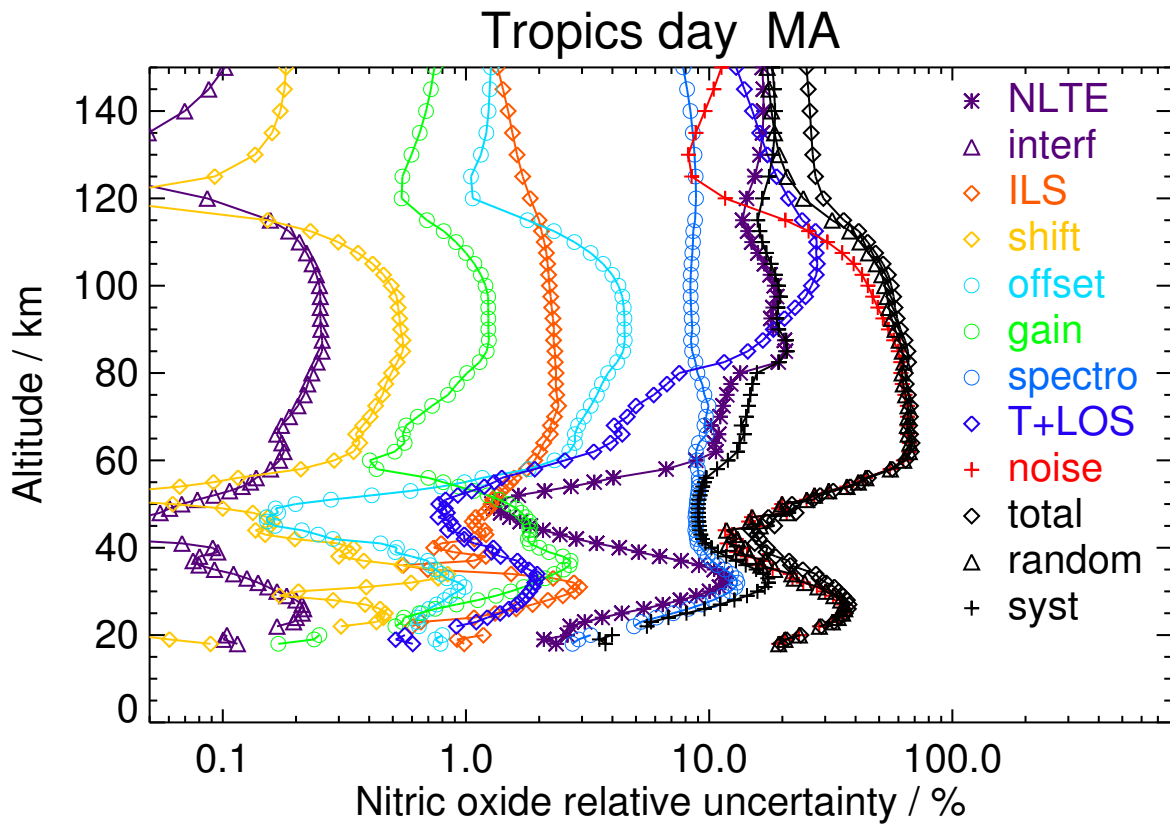

**Figure S17.** V8R\_NO\_561 Tropics day

**Table S19.** Nitric oxide error budget for Tropics night. All uncertainties are  $1\sigma$ .

| altitude<br>(km) | mean target<br>(ppmv) | NLTE<br>(%) | interf<br>(%) | ILS<br>(%) | shift<br>(%) | offset<br>(%) | gain<br>(%) | spectro<br>(%) | T+LOS<br>(%) | noise<br>(%) | random<br>(%) | syst<br>(%) | total<br>(%) |
|------------------|-----------------------|-------------|---------------|------------|--------------|---------------|-------------|----------------|--------------|--------------|---------------|-------------|--------------|
| 60               | 0.00                  | 8.48        | 0.49          | 2.47       | 0.24         | 2.73          | 3.06        | 9.83           | 6.23         | 81.96        | 82.41         | 12.54       | 83.36        |
| 90               | 0.19                  | 10.04       | 0.27          | 2.20       | 0.34         | 3.25          | 1.04        | 9.41           | 16.83        | 47.17        | 50.31         | 13.54       | 52.10        |
| 100              | 1.66                  | 11.94       | 0.21          | 2.20       | 0.26         | 2.86          | 0.82        | 9.76           | 20.06        | 35.89        | 41.37         | 15.19       | 44.07        |
| 110              | 7.13                  | 12.86       | 0.12          | 2.01       | 0.09         | 1.99          | 0.75        | 9.13           | 20.44        | 26.48        | 33.66         | 15.60       | 37.10        |
| 120              | 12.72                 | 12.41       | 0.10          | 1.75       | 0.14         | 2.05          | 0.60        | 8.10           | 18.36        | 23.43        | 29.97         | 14.65       | 33.36        |
| 130              | 17.12                 | 11.70       | 0.13          | 1.59       | 0.19         | 2.23          | 0.53        | 7.39           | 16.61        | 23.25        | 28.79         | 13.66       | 31.87        |
| 140              | 22.60                 | 10.99       | 0.14          | 1.49       | 0.19         | 2.20          | 0.49        | 6.86           | 15.27        | 22.49        | 27.40         | 12.78       | 30.23        |
| 150              | 25.25                 | 10.07       | 0.14          | 1.36       | 0.18         | 2.06          | 0.45        | 6.24           | 13.75        | 20.89        | 25.22         | 11.68       | 27.79        |

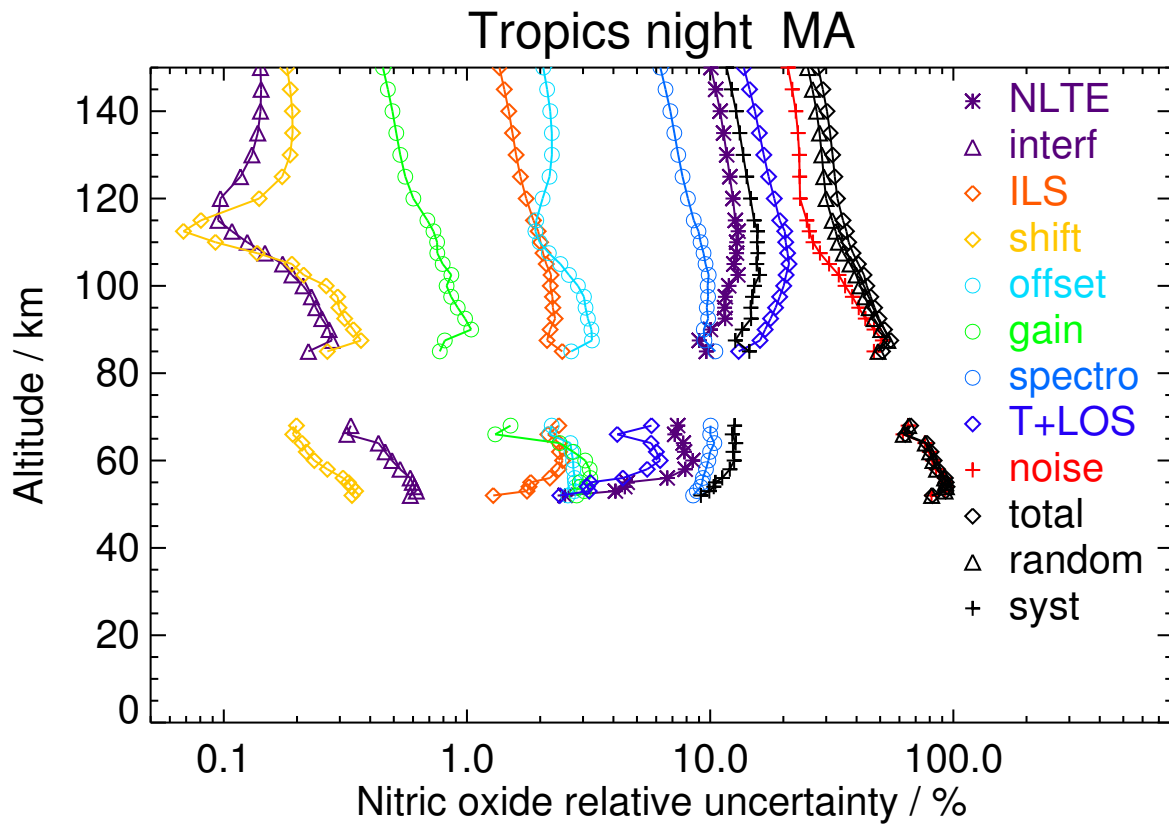**Figure S18.** V8R\_NO\_561 Tropics night

**Table S20.** Nitric oxide error budget for Southern midlatitude winter day. All uncertainties are  $1\sigma$ .

| altitude (km) | mean target (ppmv) | NLTE (%) | interf (%) | ILS (%) | shift (%) | offset (%) | gain (%) | spectro (%) | T+LOS (%) | noise (%) | random (%) | syst (%) | total (%) |
|---------------|--------------------|----------|------------|---------|-----------|------------|----------|-------------|-----------|-----------|------------|----------|-----------|
| 20            | 0.00               | 2.20     | 0.37       | 0.22    | 0.04      | 0.46       | 1.27     | 5.02        | 1.05      | 24.15     | 24.23      | 5.38     | 24.82     |
| 30            | 0.00               | 12.53    | 0.25       | 1.43    | 0.37      | 1.22       | 3.49     | 12.40       | 2.34      | 30.76     | 31.39      | 17.13    | 35.76     |
| 40            | 0.01               | 6.28     | 0.09       | 1.55    | 0.24      | 0.59       | 1.90     | 10.24       | 1.28      | 25.11     | 25.48      | 11.58    | 27.98     |
| 50            | 0.01               | 2.08     | 0.09       | 1.05    | 0.04      | 0.37       | 1.21     | 8.24        | 1.13      | 30.77     | 30.87      | 8.35     | 31.98     |
| 60            | 0.01               | 7.36     | 0.17       | 1.12    | 0.25      | 1.87       | 0.72     | 7.34        | 5.47      | 56.58     | 57.06      | 9.41     | 57.83     |
| 70            | 0.02               | 11.79    | 0.21       | 1.33    | 0.32      | 2.32       | 0.81     | 7.38        | 9.02      | 58.21     | 59.26      | 12.60    | 60.59     |
| 80            | 0.07               | 15.89    | 0.24       | 1.21    | 0.36      | 2.66       | 0.96     | 7.30        | 13.97     | 53.45     | 55.83      | 15.83    | 58.03     |
| 90            | 0.87               | 18.47    | 0.24       | 1.28    | 0.34      | 3.21       | 0.75     | 7.64        | 20.51     | 44.34     | 49.68      | 18.20    | 52.91     |
| 100           | 8.57               | 17.15    | 0.21       | 1.38    | 0.26      | 3.22       | 0.61     | 7.98        | 31.36     | 33.65     | 46.72      | 17.42    | 49.87     |
| 110           | 45.65              | 13.30    | 0.22       | 1.51    | 0.08      | 1.89       | 0.58     | 8.33        | 41.40     | 21.04     | 46.81      | 14.76    | 49.08     |
| 120           | 75.08              | 14.57    | 0.10       | 1.51    | 0.07      | 1.20       | 0.54     | 8.32        | 33.46     | 10.82     | 35.41      | 16.37    | 39.01     |
| 130           | 100.98             | 16.53    | 0.06       | 1.43    | 0.10      | 1.30       | 0.54     | 7.99        | 25.71     | 9.42      | 27.57      | 18.18    | 33.03     |
| 140           | 135.85             | 17.08    | 0.13       | 1.36    | 0.09      | 1.36       | 0.54     | 7.60        | 21.46     | 11.09     | 24.35      | 18.55    | 30.61     |
| 150           | 173.61             | 17.00    | 0.17       | 1.25    | 0.08      | 1.41       | 0.53     | 7.04        | 17.85     | 12.80     | 22.23      | 18.19    | 28.72     |

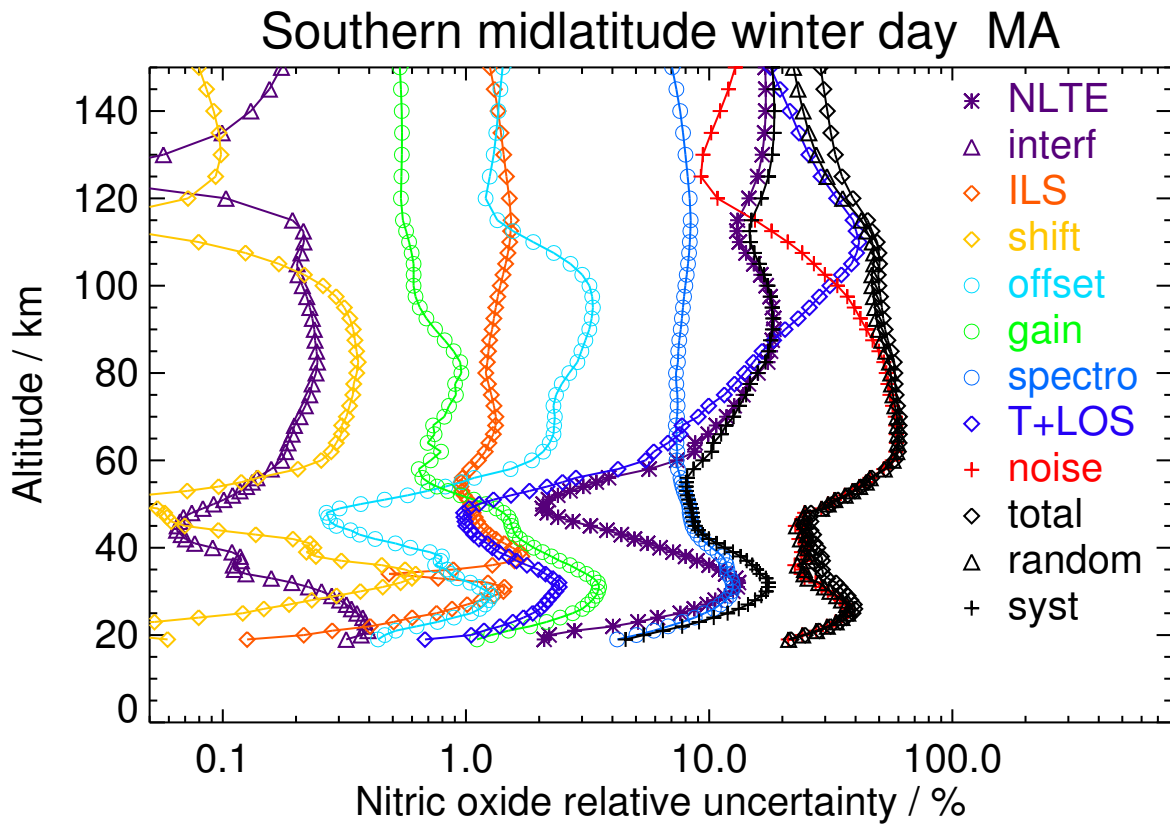

**Figure S19.** V8R\_NO\_561 Southern midlatitude winter day

**Table S21.** Nitric oxide error budget for Southern midlatitude winter night. All uncertainties are  $1\sigma$ .

| altitude (km) | mean target (ppmv) | NLTE (%) | interf (%) | ILS (%) | shift (%) | offset (%) | gain (%) | spectro (%) | T+LOS (%) | noise (%) | random (%) | syst (%) | total (%) |
|---------------|--------------------|----------|------------|---------|-----------|------------|----------|-------------|-----------|-----------|------------|----------|-----------|
| 50            | 0.00               | 6.75     | 0.26       | 0.95    | 0.24      | 1.00       | 0.44     | 10.84       | 1.67      | 51.28     | 51.76      | 10.89    | 52.90     |
| 60            | 0.01               | 10.79    | 0.23       | 1.35    | 0.11      | 2.12       | 1.59     | 8.87        | 7.33      | 57.06     | 58.33      | 10.56    | 59.28     |
| 70            | 0.04               | 8.78     | 0.17       | 1.11    | 0.16      | 1.96       | 0.89     | 8.80        | 7.92      | 53.71     | 54.75      | 10.50    | 55.75     |
| 80            | 0.19               | 13.71    | 0.20       | 1.17    | 0.22      | 2.15       | 0.83     | 9.55        | 13.94     | 50.19     | 53.08      | 13.49    | 54.77     |
| 90            | 1.57               | 13.28    | 0.23       | 1.08    | 0.28      | 2.94       | 0.70     | 8.92        | 18.57     | 43.98     | 48.63      | 13.45    | 50.46     |
| 100           | 11.39              | 13.85    | 0.25       | 1.05    | 0.31      | 3.06       | 0.59     | 8.33        | 25.16     | 33.66     | 42.86      | 14.16    | 45.14     |
| 110           | 43.33              | 12.57    | 0.19       | 1.10    | 0.13      | 1.91       | 0.49     | 7.66        | 33.53     | 22.53     | 40.91      | 13.42    | 43.05     |
| 120           | 73.97              | 14.44    | 0.06       | 1.25    | 0.06      | 1.12       | 0.50     | 7.59        | 29.57     | 11.46     | 32.08      | 15.69    | 35.71     |
| 130           | 89.41              | 15.91    | 0.08       | 1.33    | 0.10      | 1.38       | 0.55     | 7.45        | 23.98     | 12.03     | 27.36      | 16.84    | 32.13     |
| 140           | 101.30             | 16.09    | 0.13       | 1.33    | 0.10      | 1.44       | 0.56     | 7.19        | 20.64     | 13.38     | 25.30      | 16.73    | 30.33     |
| 150           | 109.92             | 15.58    | 0.16       | 1.28    | 0.09      | 1.45       | 0.55     | 6.72        | 17.71     | 14.23     | 23.54      | 15.93    | 28.42     |

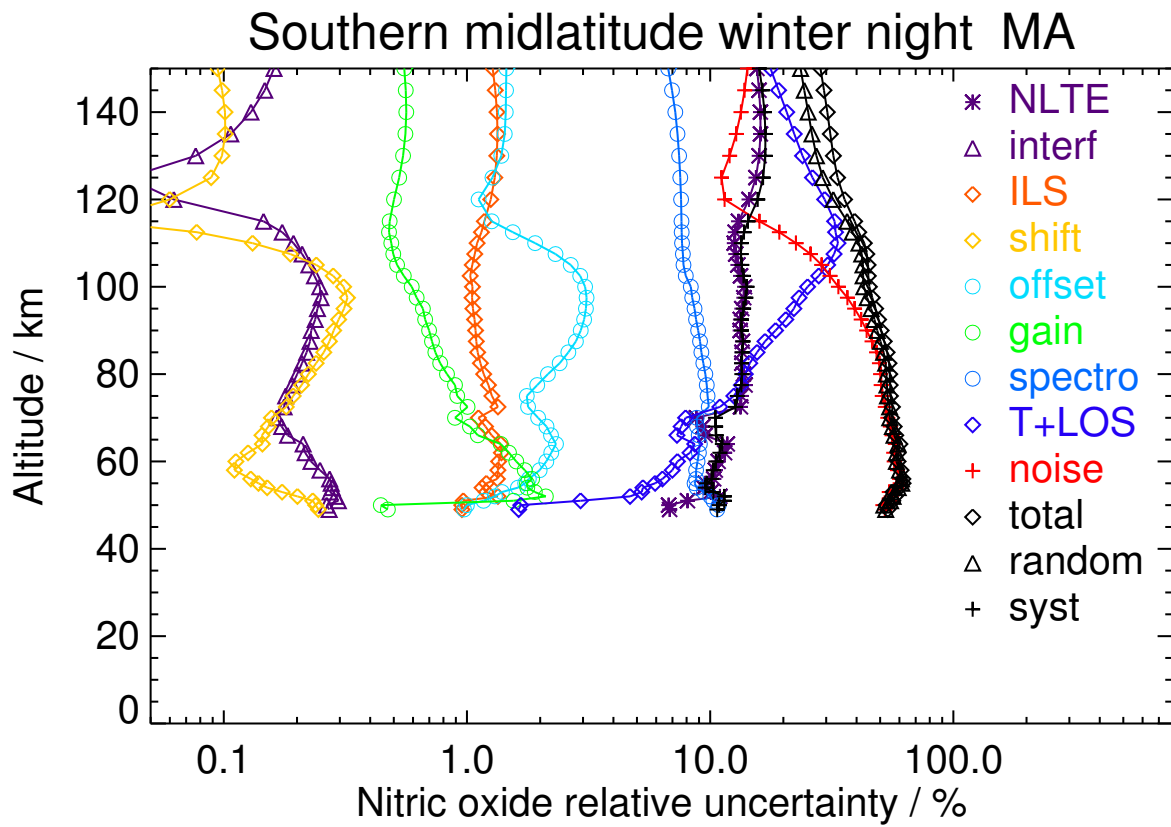

**Figure S20.** V8R\_NO\_561 Southern midlatitude winter night

**Table S22.** Nitric oxide error budget for Southern midlatitude spring day. All uncertainties are  $1\sigma$ .

| altitude (km) | mean target (ppmv) | NLTE (%) | interf (%) | ILS (%) | shift (%) | offset (%) | gain (%) | spectro (%) | T+LOS (%) | noise (%) | random (%) | syst (%) | total (%) |
|---------------|--------------------|----------|------------|---------|-----------|------------|----------|-------------|-----------|-----------|------------|----------|-----------|
| 20            | 0.00               | 1.46     | 0.37       | 0.28    | 0.07      | 0.46       | 1.17     | 5.08        | 0.82      | 23.12     | 23.21      | 5.15     | 23.77     |
| 30            | 0.00               | 8.46     | 0.13       | 1.53    | 0.34      | 0.76       | 2.82     | 10.36       | 1.67      | 21.11     | 21.47      | 13.32    | 25.27     |
| 40            | 0.01               | 4.85     | 0.07       | 1.14    | 0.25      | 0.45       | 1.80     | 9.62        | 1.11      | 19.83     | 20.03      | 10.68    | 22.70     |
| 50            | 0.01               | 1.79     | 0.09       | 1.10    | 0.06      | 0.29       | 1.25     | 8.28        | 0.86      | 27.34     | 27.42      | 8.41     | 28.68     |
| 60            | 0.01               | 9.91     | 0.25       | 1.41    | 0.37      | 1.96       | 0.68     | 7.94        | 4.24      | 57.42     | 57.87      | 11.57    | 59.01     |
| 70            | 0.01               | 16.77    | 0.31       | 1.52    | 0.61      | 2.55       | 1.14     | 7.27        | 7.23      | 61.33     | 62.39      | 16.32    | 64.49     |
| 80            | 0.03               | 27.34    | 0.42       | 1.68    | 0.67      | 3.83       | 1.55     | 8.51        | 11.38     | 64.85     | 67.21      | 25.66    | 71.94     |
| 90            | 0.40               | 25.13    | 0.46       | 1.60    | 0.57      | 4.51       | 1.32     | 8.08        | 15.14     | 58.55     | 61.48      | 24.48    | 66.18     |
| 100           | 3.41               | 24.05    | 0.42       | 1.64    | 0.42      | 4.09       | 1.04     | 8.37        | 19.68     | 43.90     | 49.25      | 23.63    | 54.63     |
| 110           | 20.40              | 19.21    | 0.38       | 1.69    | 0.20      | 2.75       | 0.76     | 8.63        | 24.96     | 29.91     | 39.70      | 19.91    | 44.41     |
| 120           | 46.16              | 16.88    | 0.19       | 1.62    | 0.03      | 1.15       | 0.53     | 8.65        | 24.73     | 12.52     | 28.15      | 18.44    | 33.65     |
| 130           | 83.89              | 17.73    | 0.01       | 1.53    | 0.08      | 1.03       | 0.54     | 8.44        | 21.82     | 7.44      | 23.33      | 19.40    | 30.34     |
| 140           | 143.16             | 18.14    | 0.11       | 1.45    | 0.08      | 1.06       | 0.57     | 8.11        | 19.40     | 8.25      | 21.32      | 19.71    | 29.03     |
| 150           | 200.40             | 18.18    | 0.18       | 1.35    | 0.08      | 1.16       | 0.59     | 7.58        | 16.81     | 10.53     | 20.16      | 19.45    | 28.01     |

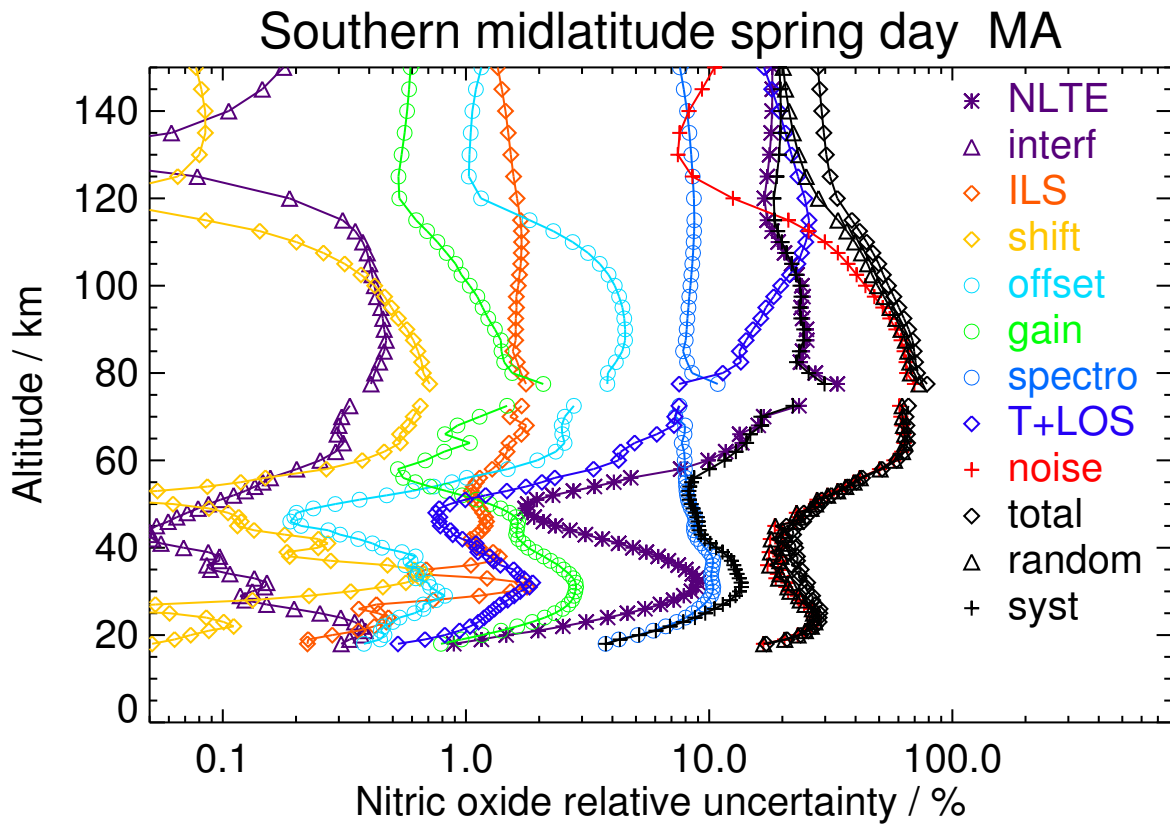

**Figure S21.** V8R\_NO\_561 Southern midlatitude spring day

**Table S23.** Nitric oxide error budget for Southern midlatitude spring night. All uncertainties are  $1\sigma$ .

| altitude (km) | mean target (ppmv) | NLTE (%) | interf (%) | ILS (%) | shift (%) | offset (%) | gain (%) | spectro (%) | T+LOS (%) | noise (%) | random (%) | syst (%) | total (%) |
|---------------|--------------------|----------|------------|---------|-----------|------------|----------|-------------|-----------|-----------|------------|----------|-----------|
| 60            | 0.01               | 7.59     | 0.39       | 1.60    | 0.14      | 2.64       | 2.74     | 8.29        | 5.18      | 73.91     | 74.33      | 10.40    | 75.06     |
| 70            | 0.03               | 6.42     | 0.22       | 1.22    | 0.18      | 1.48       | 0.91     | 9.17        | 5.25      | 46.55     | 47.05      | 10.52    | 48.21     |
| 80            | 0.05               | 8.08     | 0.40       | 1.27    | 0.32      | 2.57       | 0.72     | 8.79        | 10.15     | 53.53     | 54.68      | 11.44    | 55.86     |
| 90            | 0.45               | 12.19    | 0.49       | 1.44    | 0.39      | 3.39       | 0.65     | 8.94        | 14.83     | 50.49     | 53.18      | 13.55    | 54.88     |
| 100           | 4.74               | 12.56    | 0.51       | 1.26    | 0.44      | 3.45       | 0.42     | 7.57        | 23.83     | 36.36     | 44.23      | 12.76    | 46.03     |
| 110           | 17.14              | 12.20    | 0.38       | 1.21    | 0.20      | 1.90       | 0.53     | 7.22        | 26.99     | 23.24     | 36.03      | 13.31    | 38.40     |
| 120           | 24.89              | 13.28    | 0.05       | 1.28    | 0.05      | 1.28       | 0.46     | 7.24        | 21.67     | 13.95     | 26.02      | 14.81    | 29.94     |
| 130           | 34.27              | 13.40    | 0.15       | 1.27    | 0.12      | 1.50       | 0.53     | 6.93        | 19.36     | 13.80     | 24.15      | 14.62    | 28.23     |
| 140           | 45.05              | 13.03    | 0.23       | 1.24    | 0.13      | 1.57       | 0.56     | 6.58        | 17.59     | 14.64     | 23.34      | 14.01    | 27.23     |
| 150           | 53.15              | 12.25    | 0.27       | 1.17    | 0.13      | 1.55       | 0.56     | 6.08        | 15.69     | 14.74     | 22.02      | 13.03    | 25.59     |

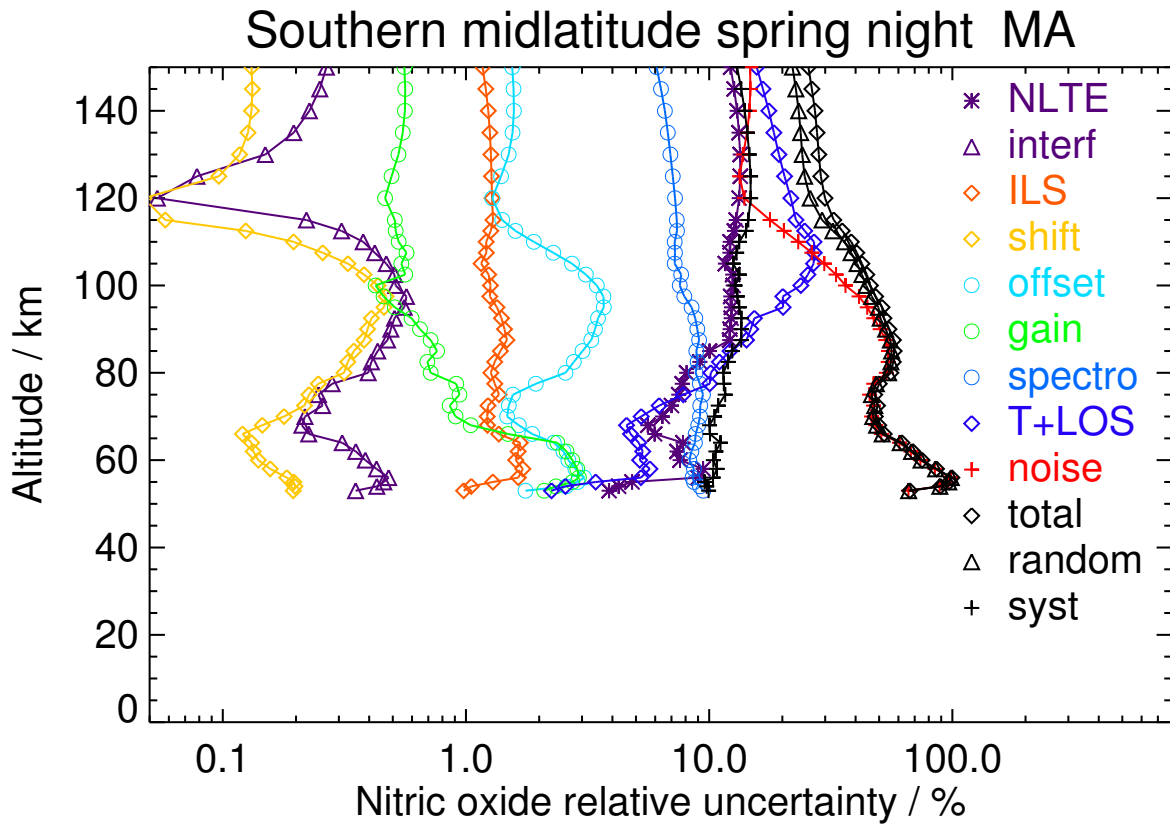

**Figure S22.** V8R\_NO\_561 Southern midlatitude spring night



**Table S24.** Nitric oxide error budget for Southern midlatitude summer day. All uncertainties are  $1\sigma$ .

| altitude (km) | mean target (ppmv) | NLTE (%) | interf (%) | ILS (%) | shift (%) | offset (%) | gain (%) | spectro (%) | T+LOS (%) | noise (%) | random (%) | syst (%) | total (%) |
|---------------|--------------------|----------|------------|---------|-----------|------------|----------|-------------|-----------|-----------|------------|----------|-----------|
| 20            | 0.00               | 1.38     | 0.49       | 0.31    | 0.29      | 0.45       | 0.63     | 4.75        | 1.15      | 23.98     | 24.06      | 4.80     | 24.53     |
| 30            | 0.01               | 8.27     | 0.30       | 2.70    | 0.39      | 0.73       | 2.12     | 10.63       | 2.07      | 21.05     | 21.43      | 13.50    | 25.33     |
| 40            | 0.01               | 3.24     | 0.03       | 0.70    | 0.33      | 0.36       | 1.70     | 8.69        | 1.26      | 13.38     | 13.53      | 9.34     | 16.44     |
| 50            | 0.01               | 1.57     | 0.07       | 0.95    | 0.05      | 0.20       | 1.21     | 7.97        | 0.95      | 18.92     | 19.01      | 8.13     | 20.67     |
| 60            | 0.01               | 11.58    | 0.26       | 1.12    | 0.72      | 1.66       | 1.60     | 7.07        | 4.36      | 52.01     | 52.74      | 11.53    | 53.99     |
| 70            | 0.01               | 17.29    | 0.34       | 1.52    | 0.93      | 2.27       | 1.93     | 7.01        | 10.31     | 53.92     | 55.51      | 17.10    | 58.09     |
| 80            | 0.03               | 27.36    | 0.26       | 1.63    | 0.82      | 2.72       | 1.66     | 9.55        | 22.13     | 49.24     | 55.29      | 26.65    | 61.38     |
| 90            | 0.79               | 28.19    | 0.21       | 1.28    | 0.81      | 3.62       | 1.53     | 7.23        | 19.14     | 46.71     | 51.77      | 27.06    | 58.42     |
| 100           | 8.42               | 29.51    | 0.12       | 1.38    | 0.45      | 3.37       | 0.76     | 7.61        | 19.21     | 33.92     | 41.08      | 27.83    | 49.62     |
| 110           | 38.82              | 22.97    | 0.27       | 1.66    | 0.06      | 2.29       | 0.60     | 7.99        | 28.03     | 21.62     | 36.75      | 22.41    | 43.04     |
| 120           | 73.09              | 22.30    | 0.26       | 1.64    | 0.13      | 1.36       | 0.55     | 8.12        | 28.02     | 11.40     | 30.83      | 23.08    | 38.51     |
| 130           | 117.05             | 24.57    | 0.04       | 1.51    | 0.09      | 1.23       | 0.50     | 8.08        | 22.91     | 7.44      | 24.76      | 25.30    | 35.40     |
| 140           | 191.05             | 24.78    | 0.10       | 1.42    | 0.03      | 1.02       | 0.48     | 7.86        | 19.19     | 7.21      | 21.08      | 25.60    | 33.16     |
| 150           | 260.92             | 25.34    | 0.20       | 1.31    | 0.03      | 1.01       | 0.47     | 7.44        | 15.63     | 9.00      | 18.77      | 25.95    | 32.03     |

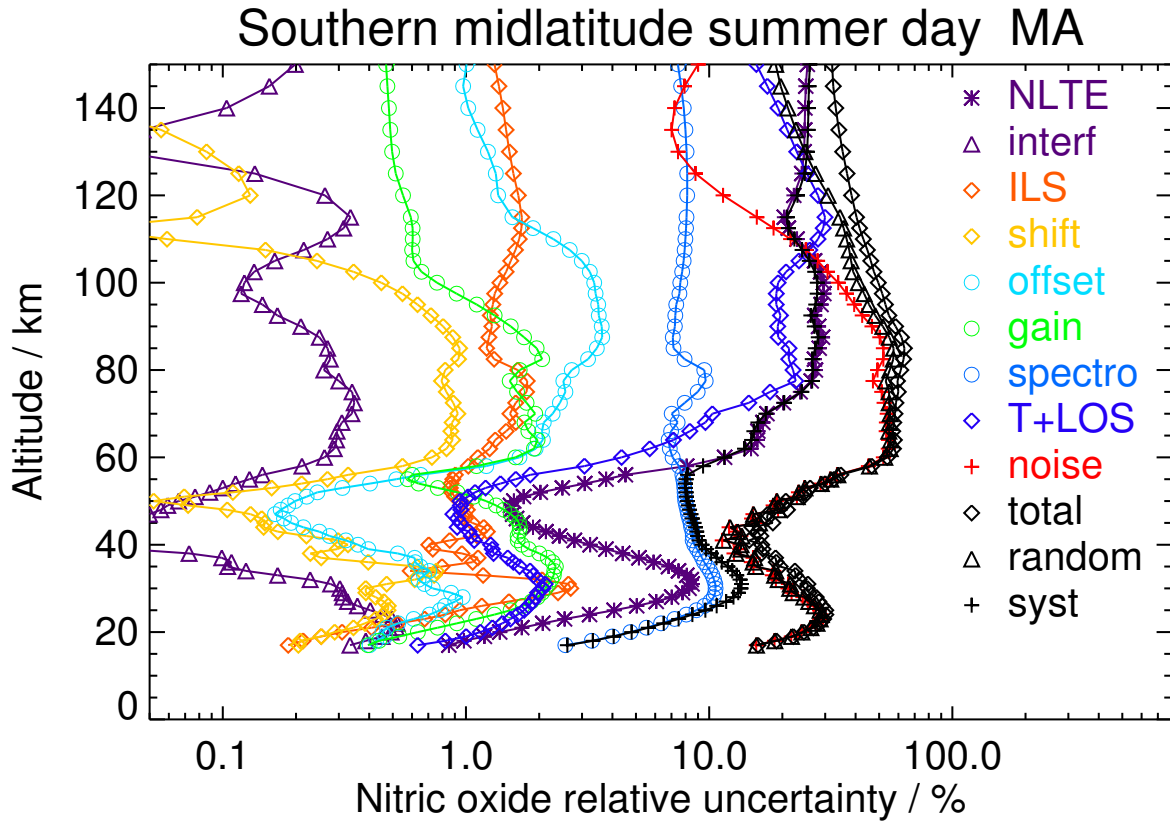

**Figure S23.** V8R\_NO\_561 Southern midlatitude summer day

**Table S25.** Nitric oxide error budget for Southern midlatitude summer night. All uncertainties are  $1\sigma$ .

| altitude (km) | mean target (ppmv) | NLTE (%) | interf (%) | ILS (%) | shift (%) | offset (%) | gain (%) | spectro (%) | T+LOS (%) | noise (%) | random (%) | syst (%) | total (%) |
|---------------|--------------------|----------|------------|---------|-----------|------------|----------|-------------|-----------|-----------|------------|----------|-----------|
| 40            | 0.00               | 0.55     | 0.72       | 0.49    | 0.16      | 0.47       | 0.39     | 0.23        | 0.75      | 40.37     | 40.39      | 0.85     | 40.40     |
| 50            | 0.00               | 4.83     | 0.39       | 1.12    | 0.41      | 1.11       | 3.33     | 4.26        | 2.85      | 31.60     | 32.04      | 5.98     | 32.59     |
| 60            | 0.00               | 18.82    | 0.53       | 2.12    | 0.30      | 2.47       | 2.55     | 11.29       | 6.88      | 65.57     | 68.00      | 14.90    | 69.61     |
| 70            | 0.05               | 18.34    | 0.26       | 1.83    | 0.32      | 1.54       | 1.19     | 11.84       | 10.36     | 42.03     | 45.12      | 17.93    | 48.56     |
| 80            | 0.07               | 19.25    | 0.42       | 1.19    | 0.53      | 2.38       | 1.10     | 10.88       | 19.59     | 46.62     | 51.54      | 19.97    | 55.27     |
| 90            | 1.21               | 27.40    | 0.32       | 1.92    | 0.76      | 3.38       | 0.85     | 11.28       | 18.11     | 41.71     | 49.17      | 23.35    | 54.43     |
| 100           | 9.97               | 20.55    | 0.31       | 1.55    | 0.58      | 3.25       | 0.83     | 8.38        | 24.79     | 33.63     | 43.63      | 18.68    | 47.46     |
| 110           | 45.44              | 16.59    | 0.32       | 1.32    | 0.27      | 1.93       | 0.72     | 7.14        | 32.14     | 21.41     | 39.56      | 16.08    | 42.70     |
| 120           | 104.74             | 18.73    | 0.23       | 1.26    | 0.01      | 1.03       | 0.51     | 7.31        | 28.40     | 10.15     | 30.84      | 19.11    | 36.28     |
| 130           | 115.48             | 22.60    | 0.09       | 1.45    | 0.13      | 1.05       | 0.66     | 8.00        | 21.53     | 8.42      | 24.50      | 22.64    | 33.36     |
| 140           | 143.19             | 23.99    | 0.25       | 1.56    | 0.14      | 1.07       | 0.76     | 8.17        | 17.81     | 10.23     | 22.69      | 23.52    | 32.68     |
| 150           | 161.77             | 24.15    | 0.35       | 1.58    | 0.13      | 1.16       | 0.79     | 7.91        | 14.79     | 12.11     | 21.86      | 23.19    | 31.87     |

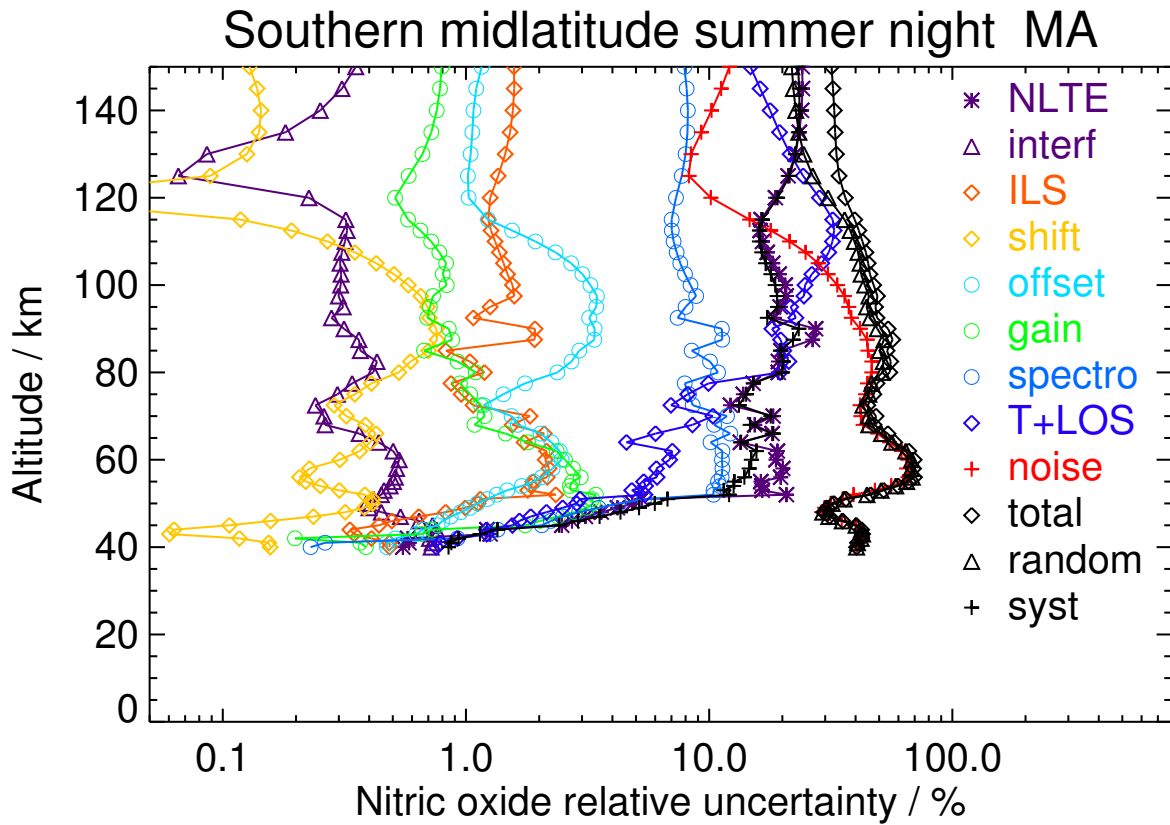

**Figure S24.** V8R\_NO\_561 Southern midlatitude summer night

**Table S26.** Nitric oxide error budget for Southern midlatitude autumn day. All uncertainties are  $1\sigma$ .

| altitude (km) | mean target (ppmv) | NLTE (%) | interf (%) | ILS (%) | shift (%) | offset (%) | gain (%) | spectro (%) | T+LOS (%) | noise (%) | random (%) | syst (%) | total (%) |
|---------------|--------------------|----------|------------|---------|-----------|------------|----------|-------------|-----------|-----------|------------|----------|-----------|
| 20            | 0.00               | 1.97     | 0.33       | 0.19    | 0.09      | 0.49       | 1.23     | 4.79        | 0.91      | 23.72     | 23.78      | 5.18     | 24.34     |
| 30            | 0.01               | 11.43    | 0.22       | 1.92    | 0.36      | 1.06       | 3.87     | 12.70       | 2.23      | 25.59     | 26.02      | 17.18    | 31.18     |
| 40            | 0.01               | 5.74     | 0.05       | 1.09    | 0.31      | 0.53       | 2.34     | 9.74        | 1.50      | 18.88     | 19.09      | 11.38    | 22.22     |
| 50            | 0.01               | 2.14     | 0.06       | 1.09    | 0.06      | 0.31       | 1.41     | 8.62        | 1.15      | 25.61     | 25.74      | 8.76     | 27.19     |
| 60            | 0.01               | 7.50     | 0.14       | 1.40    | 0.33      | 1.70       | 0.98     | 7.95        | 3.24      | 53.13     | 53.62      | 9.13     | 54.39     |
| 70            | 0.02               | 12.84    | 0.22       | 1.54    | 0.47      | 2.19       | 1.15     | 7.25        | 7.05      | 56.02     | 57.35      | 11.18    | 58.43     |
| 80            | 0.06               | 12.49    | 0.21       | 1.52    | 0.43      | 2.36       | 1.27     | 7.76        | 10.59     | 52.45     | 54.22      | 12.24    | 55.58     |
| 90            | 0.88               | 15.55    | 0.18       | 1.54    | 0.35      | 2.80       | 1.06     | 7.72        | 15.46     | 41.75     | 45.65      | 14.53    | 47.90     |
| 100           | 4.96               | 16.01    | 0.19       | 1.60    | 0.23      | 3.12       | 0.79     | 8.05        | 19.19     | 33.24     | 39.52      | 15.67    | 42.51     |
| 110           | 25.37              | 14.25    | 0.21       | 1.66    | 0.08      | 2.23       | 0.60     | 8.46        | 25.15     | 24.25     | 35.61      | 15.33    | 38.77     |
| 120           | 44.17              | 14.66    | 0.11       | 1.56    | 0.02      | 1.10       | 0.53     | 8.44        | 24.00     | 11.63     | 27.06      | 16.41    | 31.65     |
| 130           | 62.62              | 15.80    | 0.03       | 1.43    | 0.04      | 1.24       | 0.56     | 8.07        | 21.30     | 9.69      | 23.85      | 17.24    | 29.43     |
| 140           | 83.58              | 16.06    | 0.10       | 1.34    | 0.04      | 1.34       | 0.57     | 7.69        | 19.10     | 11.38     | 22.77      | 17.22    | 28.55     |
| 150           | 109.44             | 15.85    | 0.14       | 1.23    | 0.04      | 1.42       | 0.56     | 7.15        | 16.78     | 13.02     | 21.91      | 16.65    | 27.52     |

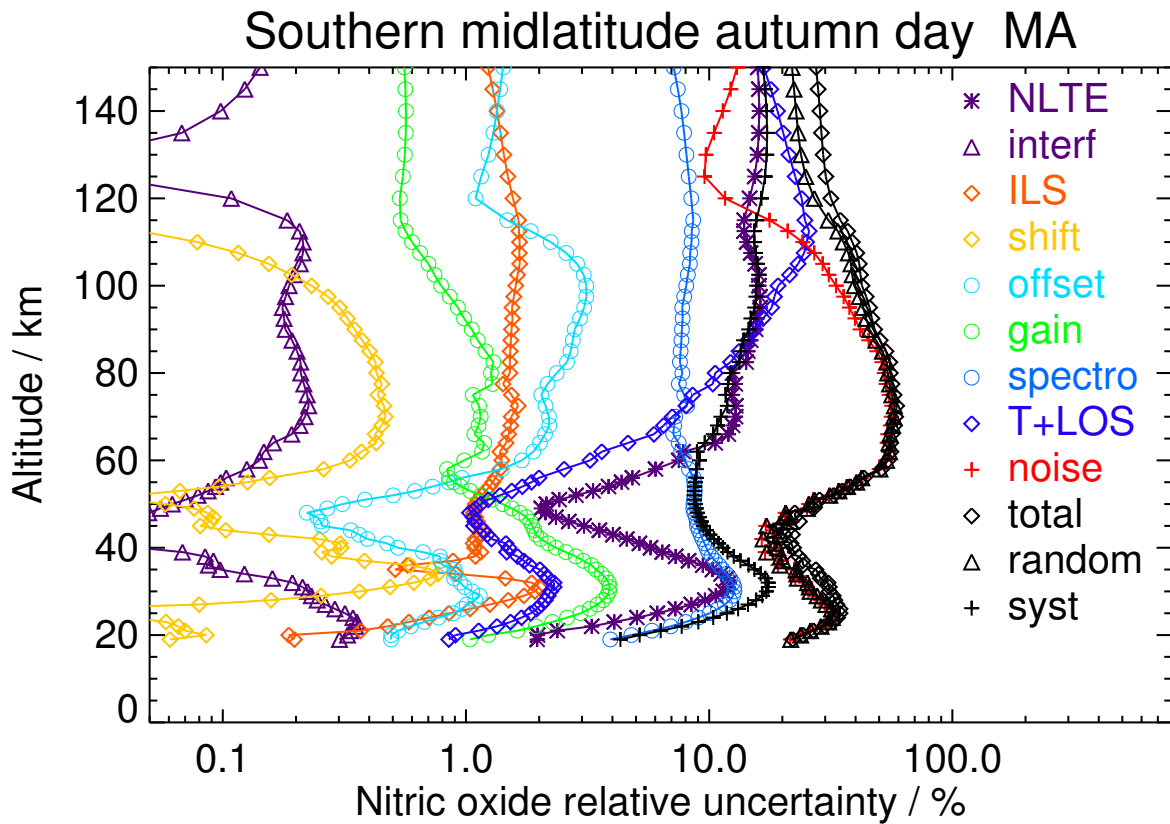

**Figure S25.** V8R\_NO\_561 Southern midlatitude autumn day

**Table S27.** Nitric oxide error budget for Southern midlatitude autumn night. All uncertainties are  $1\sigma$ .

| altitude (km) | mean target (ppmv) | NLTE (%) | interf (%) | ILS (%) | shift (%) | offset (%) | gain (%) | spectro (%) | T+LOS (%) | noise (%) | random (%) | syst (%) | total (%) |
|---------------|--------------------|----------|------------|---------|-----------|------------|----------|-------------|-----------|-----------|------------|----------|-----------|
| 50            | 0.00               | 5.90     | 0.18       | 1.00    | 0.15      | 1.08       | 0.33     | 10.74       | 2.09      | 49.46     | 49.81      | 11.02    | 51.02     |
| 60            | 0.01               | 15.86    | 0.25       | 1.84    | 0.13      | 2.14       | 1.63     | 11.38       | 6.25      | 65.08     | 66.86      | 13.98    | 68.31     |
| 70            | 0.07               | 30.27    | 0.16       | 2.59    | 0.14      | 1.55       | 1.14     | 12.57       | 8.24      | 41.07     | 50.33      | 17.49    | 53.28     |
| 80            | 0.10               | 21.66    | 0.34       | 1.81    | 0.32      | 2.54       | 0.83     | 11.86       | 13.08     | 56.51     | 60.49      | 18.05    | 63.13     |
| 90            | 0.90               | 17.97    | 0.32       | 1.40    | 0.35      | 3.23       | 0.65     | 9.47        | 14.91     | 49.08     | 53.08      | 15.50    | 55.29     |
| 100           | 10.00              | 20.01    | 0.27       | 1.15    | 0.30      | 3.15       | 0.57     | 8.36        | 23.00     | 35.56     | 44.21      | 17.93    | 47.71     |
| 110           | 48.61              | 15.38    | 0.21       | 1.05    | 0.14      | 2.10       | 0.45     | 6.90        | 28.91     | 24.13     | 39.00      | 13.69    | 41.33     |
| 120           | 40.55              | 13.24    | 0.08       | 1.29    | 0.03      | 1.23       | 0.48     | 7.02        | 19.77     | 13.92     | 25.18      | 13.36    | 28.50     |
| 130           | 56.35              | 14.34    | 0.04       | 1.35    | 0.05      | 1.13       | 0.50     | 7.13        | 16.72     | 11.12     | 21.60      | 14.03    | 25.75     |
| 140           | 66.77              | 15.03    | 0.10       | 1.36    | 0.05      | 1.25       | 0.51     | 7.08        | 14.62     | 12.64     | 21.35      | 14.05    | 25.56     |
| 150           | 68.64              | 15.11    | 0.15       | 1.32    | 0.06      | 1.38       | 0.50     | 6.79        | 12.66     | 14.34     | 21.49      | 13.51    | 25.38     |

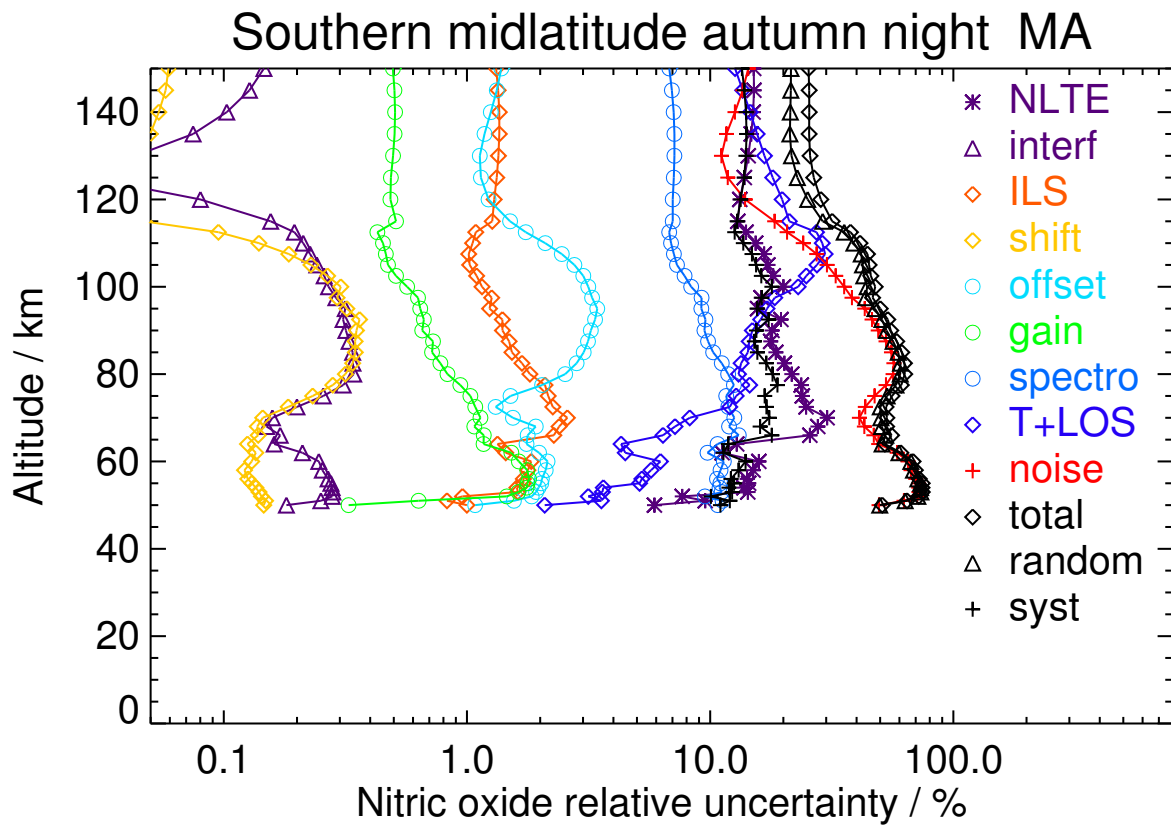

**Figure S26.** V8R\_NO\_561 Southern midlatitude autumn night

**Table S28.** Nitric oxide error budget for Southern polar winter day. All uncertainties are  $1\sigma$ .

| altitude (km) | mean target (ppmv) | NLTE (%) | interf (%) | ILS (%) | shift (%) | offset (%) | gain (%) | spectro (%) | T+LOS (%) | noise (%) | random (%) | syst (%) | total (%) |
|---------------|--------------------|----------|------------|---------|-----------|------------|----------|-------------|-----------|-----------|------------|----------|-----------|
| 30            | 0.01               | 8.02     | 0.41       | 1.67    | 0.44      | 1.42       | 1.91     | 9.79        | 2.05      | 38.58     | 38.90      | 12.19    | 40.76     |
| 40            | 0.00               | 2.64     | 0.11       | 0.96    | 0.22      | 0.50       | 1.53     | 8.58        | 1.12      | 22.27     | 22.47      | 8.73     | 24.11     |
| 50            | 0.00               | 2.88     | 0.14       | 1.33    | 0.07      | 0.39       | 1.01     | 8.07        | 1.15      | 31.17     | 31.27      | 8.48     | 32.40     |
| 60            | 0.01               | 9.99     | 0.23       | 1.71    | 0.12      | 1.80       | 0.55     | 9.05        | 9.62      | 55.54     | 56.81      | 11.78    | 58.01     |
| 70            | 0.03               | 13.24    | 0.24       | 1.81    | 0.22      | 1.99       | 0.59     | 9.63        | 16.46     | 56.05     | 58.93      | 14.69    | 60.73     |
| 80            | 0.17               | 16.32    | 0.30       | 1.65    | 0.27      | 2.18       | 0.69     | 9.15        | 20.42     | 50.78     | 55.45      | 16.70    | 57.91     |
| 90            | 1.94               | 17.61    | 0.27       | 1.53    | 0.29      | 2.61       | 0.65     | 8.27        | 20.62     | 39.15     | 44.95      | 18.05    | 48.44     |
| 100           | 19.25              | 16.54    | 0.24       | 1.45    | 0.27      | 2.76       | 0.58     | 7.60        | 31.81     | 30.15     | 44.50      | 16.80    | 47.56     |
| 110           | 83.47              | 12.72    | 0.25       | 1.47    | 0.11      | 1.82       | 0.53     | 7.56        | 53.94     | 20.40     | 58.02      | 13.55    | 59.58     |
| 120           | 135.27             | 15.50    | 0.10       | 1.46    | 0.09      | 1.11       | 0.53     | 8.10        | 39.66     | 9.79      | 41.05      | 17.11    | 44.48     |
| 130           | 170.99             | 18.54    | 0.10       | 1.42    | 0.13      | 1.33       | 0.61     | 8.25        | 25.84     | 10.16     | 27.99      | 20.10    | 34.46     |
| 140           | 199.87             | 19.33    | 0.20       | 1.38    | 0.13      | 1.35       | 0.69     | 8.06        | 19.69     | 11.90     | 23.30      | 20.72    | 31.18     |
| 150           | 226.53             | 19.24    | 0.26       | 1.29    | 0.12      | 1.37       | 0.72     | 7.60        | 15.40     | 13.41     | 20.83      | 20.37    | 29.14     |

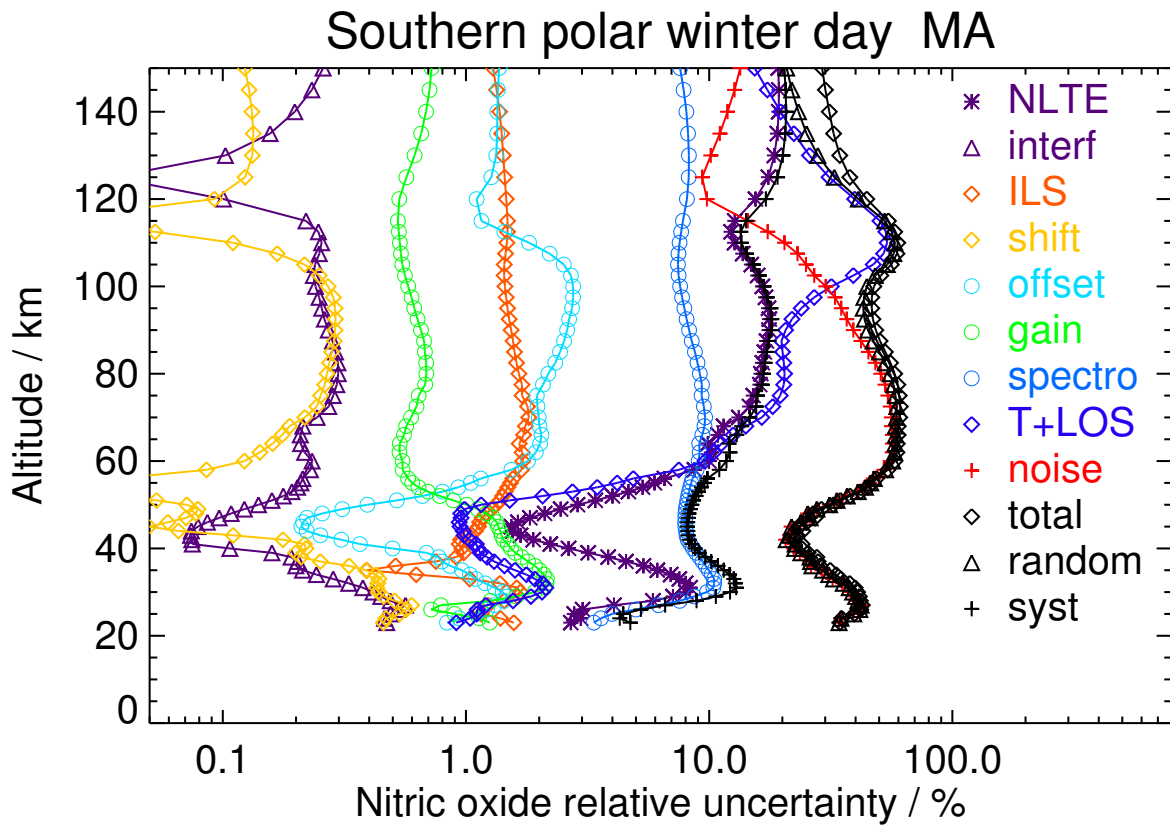

**Figure S27.** V8R\_NO\_561 Southern polar winter day

**Table S29.** Nitric oxide error budget for Southern polar winter night. All uncertainties are  $1\sigma$ .

| altitude<br>(km) | mean target<br>(ppmv) | NLTE<br>(%) | interf<br>(%) | ILS<br>(%) | shift<br>(%) | offset<br>(%) | gain<br>(%) | spectro<br>(%) | T+LOS<br>(%) | noise<br>(%) | random<br>(%) | syst<br>(%) | total<br>(%) |
|------------------|-----------------------|-------------|---------------|------------|--------------|---------------|-------------|----------------|--------------|--------------|---------------|-------------|--------------|
| 40               | 0.00                  | 13.98       | 0.63          | 1.90       | 0.15         | 1.59          | 3.26        | 9.46           | 4.75         | 63.21        | 64.92         | 10.29       | 65.73        |
| 50               | 0.00                  | 20.14       | 0.41          | 2.14       | 0.24         | 1.20          | 2.52        | 12.17          | 5.27         | 59.59        | 62.66         | 14.81       | 64.39        |
| 60               | 0.01                  | 25.60       | 0.34          | 2.51       | 0.11         | 2.07          | 1.40        | 14.09          | 7.26         | 59.16        | 63.86         | 18.47       | 66.48        |
| 70               | 0.09                  | 24.85       | 0.22          | 2.24       | 0.38         | 2.03          | 0.82        | 13.63          | 12.33        | 53.65        | 59.10         | 18.73       | 62.00        |
| 80               | 0.90                  | 24.16       | 0.20          | 1.81       | 0.48         | 2.61          | 0.79        | 11.84          | 14.90        | 52.51        | 57.74         | 19.49       | 60.94        |
| 90               | 6.00                  | 21.58       | 0.24          | 1.38       | 0.42         | 2.70          | 0.78        | 9.29           | 19.63        | 40.99        | 47.76         | 18.61       | 51.26        |
| 100              | 26.27                 | 27.56       | 0.31          | 1.25       | 0.45         | 3.00          | 0.74        | 8.27           | 24.33        | 35.73        | 45.87         | 24.57       | 52.04        |
| 110              | 88.34                 | 21.36       | 0.32          | 1.21       | 0.16         | 2.11          | 0.56        | 7.05           | 36.30        | 23.86        | 44.94         | 19.48       | 48.98        |
| 120              | 144.64                | 17.57       | 0.18          | 1.28       | 0.08         | 1.03          | 0.45        | 7.14           | 31.70        | 10.14        | 34.04         | 17.64       | 38.34        |
| 130              | 191.17                | 19.46       | 0.05          | 1.46       | 0.09         | 1.01          | 0.52        | 7.93           | 23.55        | 8.22         | 25.58         | 20.31       | 32.66        |
| 140              | 237.07                | 21.55       | 0.17          | 1.57       | 0.07         | 1.10          | 0.57        | 8.35           | 19.09        | 10.26        | 22.81         | 22.09       | 31.75        |
| 150              | 262.90                | 23.13       | 0.26          | 1.61       | 0.05         | 1.24          | 0.59        | 8.38           | 15.57        | 12.29        | 21.85         | 22.92       | 31.67        |

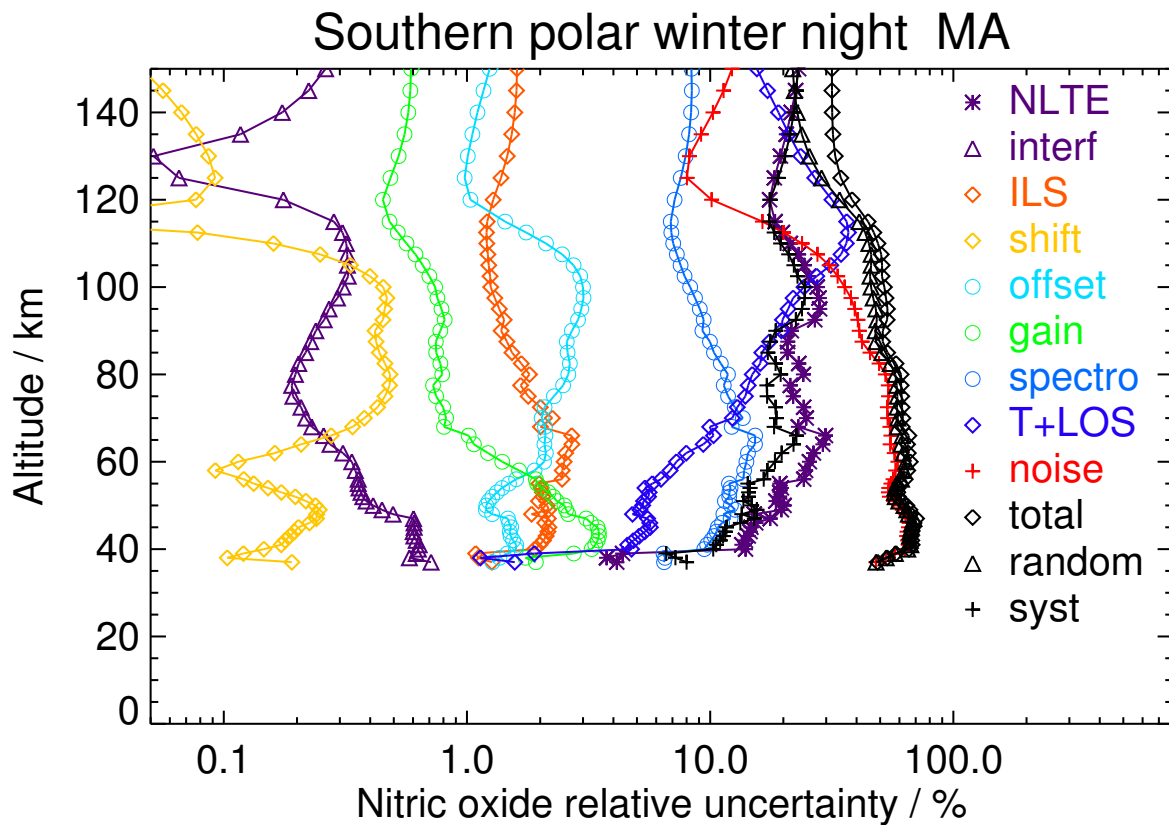**Figure S28.** V8R\_NO\_561 Southern polar winter night

**Table S30.** Nitric oxide error budget for Southern polar spring day. All uncertainties are  $1\sigma$ .

| altitude (km) | mean target (ppmv) | NLTE (%) | interf (%) | ILS (%) | shift (%) | offset (%) | gain (%) | spectro (%) | T+LOS (%) | noise (%) | random (%) | syst (%) | total (%) |
|---------------|--------------------|----------|------------|---------|-----------|------------|----------|-------------|-----------|-----------|------------|----------|-----------|
| 20            | 0.00               | 1.54     | 0.28       | 1.15    | 0.14      | 0.47       | 0.88     | 5.16        | 0.79      | 20.76     | 21.04      | 4.51     | 21.52     |
| 30            | 0.00               | 3.40     | 0.12       | 2.25    | 0.29      | 0.55       | 2.00     | 9.21        | 1.26      | 14.40     | 14.80      | 9.78     | 17.74     |
| 40            | 0.01               | 2.00     | 0.05       | 0.68    | 0.22      | 0.25       | 1.57     | 8.46        | 0.80      | 14.02     | 14.18      | 8.65     | 16.60     |
| 50            | 0.01               | 1.66     | 0.09       | 1.28    | 0.09      | 0.20       | 1.28     | 8.50        | 0.77      | 24.55     | 24.65      | 8.61     | 26.11     |
| 60            | 0.01               | 11.05    | 0.23       | 2.15    | 0.43      | 1.81       | 0.98     | 9.29        | 3.91      | 57.35     | 58.04      | 12.40    | 59.35     |
| 70            | 0.02               | 15.61    | 0.17       | 2.71    | 0.56      | 1.80       | 1.46     | 9.86        | 7.16      | 50.60     | 51.99      | 16.23    | 54.46     |
| 80            | 0.06               | 20.26    | 0.29       | 2.87    | 0.72      | 2.65       | 2.13     | 8.97        | 10.31     | 53.53     | 55.66      | 19.62    | 59.01     |
| 90            | 0.59               | 22.62    | 0.34       | 2.74    | 0.81      | 3.90       | 2.25     | 8.93        | 13.58     | 52.80     | 55.52      | 22.58    | 59.93     |
| 100           | 4.63               | 19.86    | 0.35       | 2.46    | 0.72      | 3.94       | 1.98     | 8.27        | 21.59     | 42.56     | 48.41      | 20.56    | 52.60     |
| 110           | 28.33              | 17.65    | 0.36       | 2.33    | 0.48      | 2.66       | 1.60     | 8.11        | 29.52     | 30.13     | 42.61      | 18.88    | 46.60     |
| 120           | 50.99              | 19.19    | 0.18       | 1.88    | 0.05      | 0.96       | 0.69     | 8.50        | 26.58     | 10.96     | 29.04      | 20.71    | 35.67     |
| 130           | 78.75              | 22.00    | 0.05       | 1.56    | 0.18      | 1.08       | 0.66     | 8.64        | 21.31     | 7.71      | 23.11      | 23.28    | 32.81     |
| 140           | 122.06             | 22.77    | 0.16       | 1.40    | 0.24      | 1.21       | 0.91     | 8.45        | 18.09     | 10.33     | 21.42      | 23.87    | 32.07     |
| 150           | 164.81             | 22.53    | 0.23       | 1.26    | 0.26      | 1.29       | 1.08     | 8.01        | 15.25     | 12.57     | 20.45      | 23.42    | 31.09     |

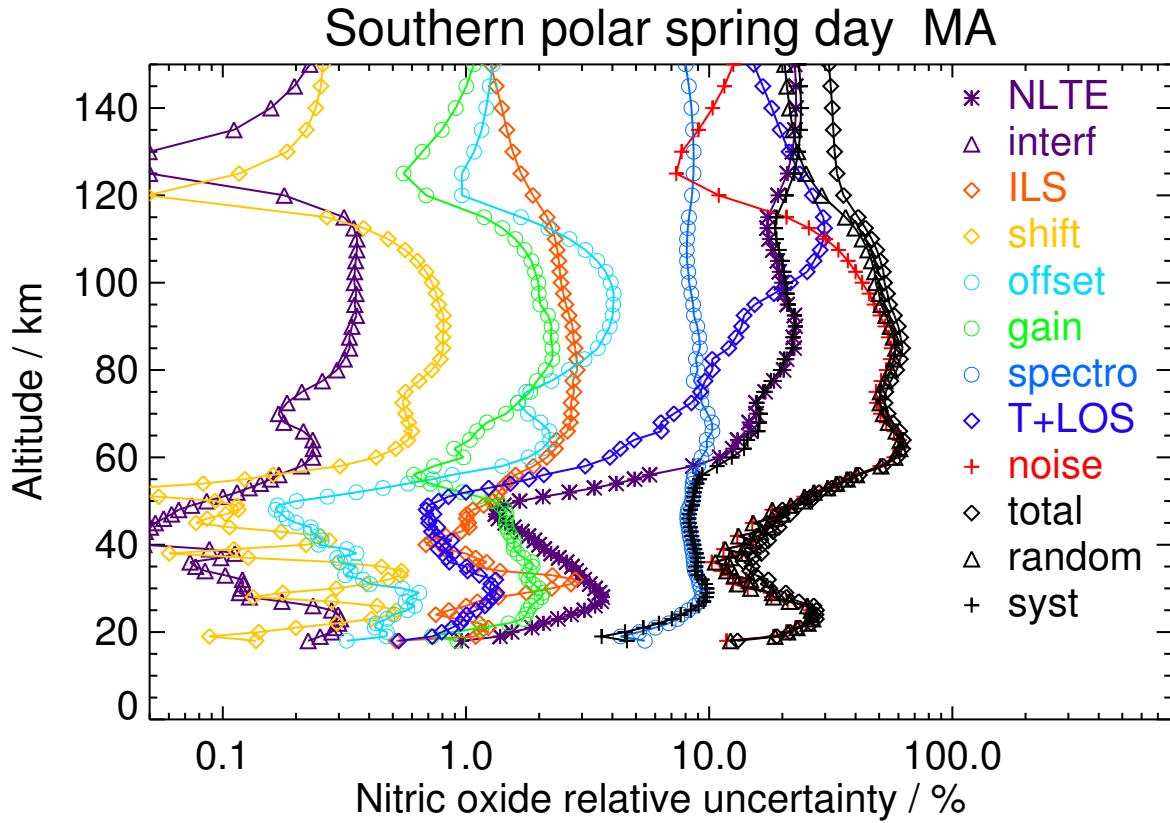

**Figure S29.** V8R\_NO\_561 Southern polar spring day

**Table S31.** Nitric oxide error budget for Southern polar spring night. All uncertainties are  $1\sigma$ .

| altitude<br>(km) | mean target<br>(ppmv) | NLTE<br>(%) | interf<br>(%) | ILS<br>(%) | shift<br>(%) | offset<br>(%) | gain<br>(%) | spectro<br>(%) | T+LOS<br>(%) | noise<br>(%) | random<br>(%) | syst<br>(%) | total<br>(%) |
|------------------|-----------------------|-------------|---------------|------------|--------------|---------------|-------------|----------------|--------------|--------------|---------------|-------------|--------------|
| 40               | 0.00                  | 1.02        | 0.61          | 1.33       | 0.03         | 0.96          | 2.03        | 1.11           | 1.72         | 52.16        | 52.26         | 1.49        | 52.28        |
| 50               | 0.00                  | 9.07        | 0.50          | 3.93       | 0.44         | 1.38          | 7.65        | 5.53           | 2.51         | 38.96        | 40.32         | 9.35        | 41.39        |
| 60               | 0.01                  | 12.84       | 0.36          | 2.42       | 0.29         | 1.95          | 4.09        | 9.06           | 4.58         | 56.72        | 57.96         | 12.38       | 59.26        |
| 70               | 0.20                  | 8.36        | 0.08          | 1.11       | 0.22         | 1.58          | 0.95        | 8.44           | 6.50         | 33.35        | 34.86         | 9.22        | 36.06        |
| 80               | 0.23                  | 12.89       | 0.25          | 1.77       | 0.44         | 1.69          | 0.84        | 7.69           | 14.35        | 41.22        | 44.55         | 12.36       | 46.23        |
| 90               | 0.95                  | 21.27       | 0.60          | 2.23       | 0.85         | 3.65          | 2.57        | 7.83           | 18.56        | 50.27        | 54.56         | 20.84       | 58.41        |
| 100              | 5.84                  | 17.55       | 0.63          | 2.01       | 0.74         | 3.78          | 1.87        | 7.38           | 23.16        | 40.87        | 47.91         | 17.23       | 50.92        |
| 110              | 25.35                 | 17.95       | 0.55          | 1.73       | 0.42         | 2.57          | 1.35        | 7.51           | 24.50        | 28.98        | 38.68         | 18.27       | 42.78        |
| 120              | 45.81                 | 18.28       | 0.17          | 1.46       | 0.02         | 0.97          | 0.55        | 7.72           | 22.39        | 10.88        | 25.47         | 19.19       | 31.89        |
| 130              | 66.91                 | 19.58       | 0.12          | 1.43       | 0.16         | 1.08          | 0.65        | 7.83           | 19.33        | 8.63         | 22.01         | 20.29       | 29.94        |
| 140              | 93.13                 | 19.61       | 0.24          | 1.42       | 0.17         | 1.21          | 0.74        | 7.61           | 17.10        | 11.02        | 21.35         | 20.11       | 29.33        |
| 150              | 112.01                | 18.83       | 0.29          | 1.36       | 0.16         | 1.26          | 0.77        | 7.13           | 14.94        | 12.52        | 20.59         | 19.12       | 28.10        |

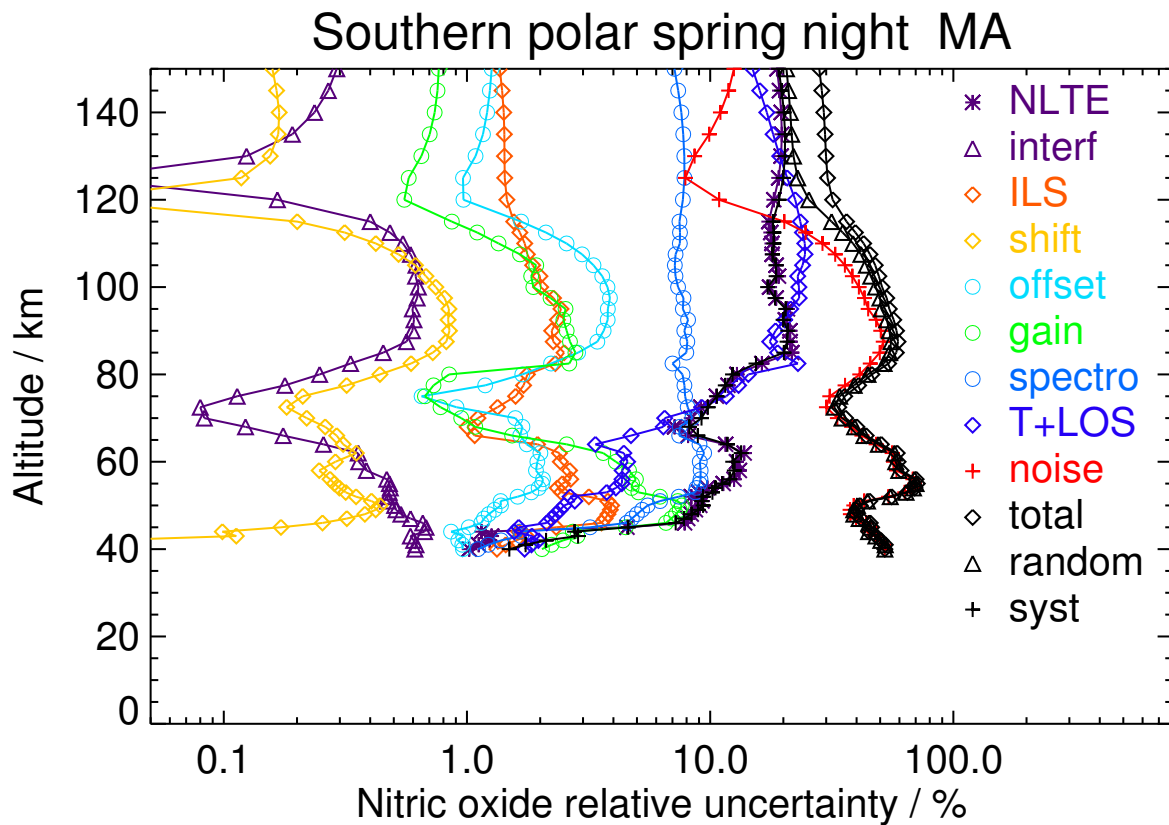**Figure S30.** V8R\_NO\_561 Southern polar spring night



**Table S32.** Nitric oxide error budget for Southern polar summer day. All uncertainties are  $1\sigma$ .

| altitude (km) | mean target (ppmv) | NLTE (%) | interf (%) | ILS (%) | shift (%) | offset (%) | gain (%) | spectro (%) | T+LOS (%) | noise (%) | random (%) | syst (%) | total (%) |
|---------------|--------------------|----------|------------|---------|-----------|------------|----------|-------------|-----------|-----------|------------|----------|-----------|
| 20            | 0.00               | 1.87     | 0.55       | 0.38    | 0.24      | 0.42       | 1.61     | 7.00        | 1.27      | 20.96     | 21.13      | 7.10     | 22.29     |
| 30            | 0.01               | 3.75     | 0.28       | 2.78    | 0.38      | 0.65       | 2.03     | 8.84        | 1.70      | 16.51     | 16.78      | 9.92     | 19.49     |
| 40            | 0.01               | 1.84     | 0.06       | 0.63    | 0.29      | 0.29       | 1.52     | 8.34        | 1.04      | 10.10     | 10.28      | 8.56     | 13.37     |
| 50            | 0.01               | 1.70     | 0.07       | 1.04    | 0.11      | 0.16       | 1.19     | 7.86        | 0.89      | 18.16     | 18.26      | 8.01     | 19.94     |
| 60            | 0.01               | 8.98     | 0.19       | 1.24    | 0.40      | 0.90       | 1.57     | 8.17        | 5.07      | 38.75     | 39.87      | 9.51     | 40.98     |
| 70            | 0.01               | 20.24    | 0.20       | 1.84    | 0.82      | 1.66       | 1.49     | 9.08        | 13.62     | 47.45     | 51.25      | 17.65    | 54.21     |
| 80            | 0.04               | 32.63    | 0.17       | 1.62    | 0.77      | 1.69       | 1.36     | 10.05       | 39.54     | 40.26     | 60.75      | 25.82    | 66.01     |
| 90            | 1.73               | 32.55    | 0.08       | 1.22    | 0.74      | 2.16       | 1.27     | 8.29        | 57.10     | 31.36     | 67.53      | 28.63    | 73.35     |
| 100           | 17.39              | 32.76    | 0.08       | 1.26    | 0.48      | 2.63       | 0.95     | 6.89        | 24.08     | 27.22     | 41.30      | 27.30    | 49.51     |
| 110           | 35.22              | 21.69    | 0.24       | 1.51    | 0.03      | 1.57       | 0.81     | 7.16        | 23.05     | 16.15     | 31.25      | 18.52    | 36.32     |
| 120           | 64.28              | 24.03    | 0.18       | 1.57    | 0.19      | 1.31       | 0.64     | 7.95        | 27.68     | 10.25     | 31.76      | 22.53    | 38.94     |
| 130           | 119.09             | 24.74    | 0.03       | 1.52    | 0.17      | 1.27       | 0.68     | 8.42        | 26.37     | 9.01      | 29.80      | 23.99    | 38.26     |
| 140           | 218.90             | 24.02    | 0.13       | 1.47    | 0.14      | 1.14       | 0.80     | 8.47        | 24.16     | 9.32      | 27.28      | 24.06    | 36.38     |
| 150           | 318.79             | 24.44    | 0.20       | 1.42    | 0.10      | 1.11       | 0.89     | 8.28        | 21.22     | 10.60     | 25.01      | 24.65    | 35.11     |

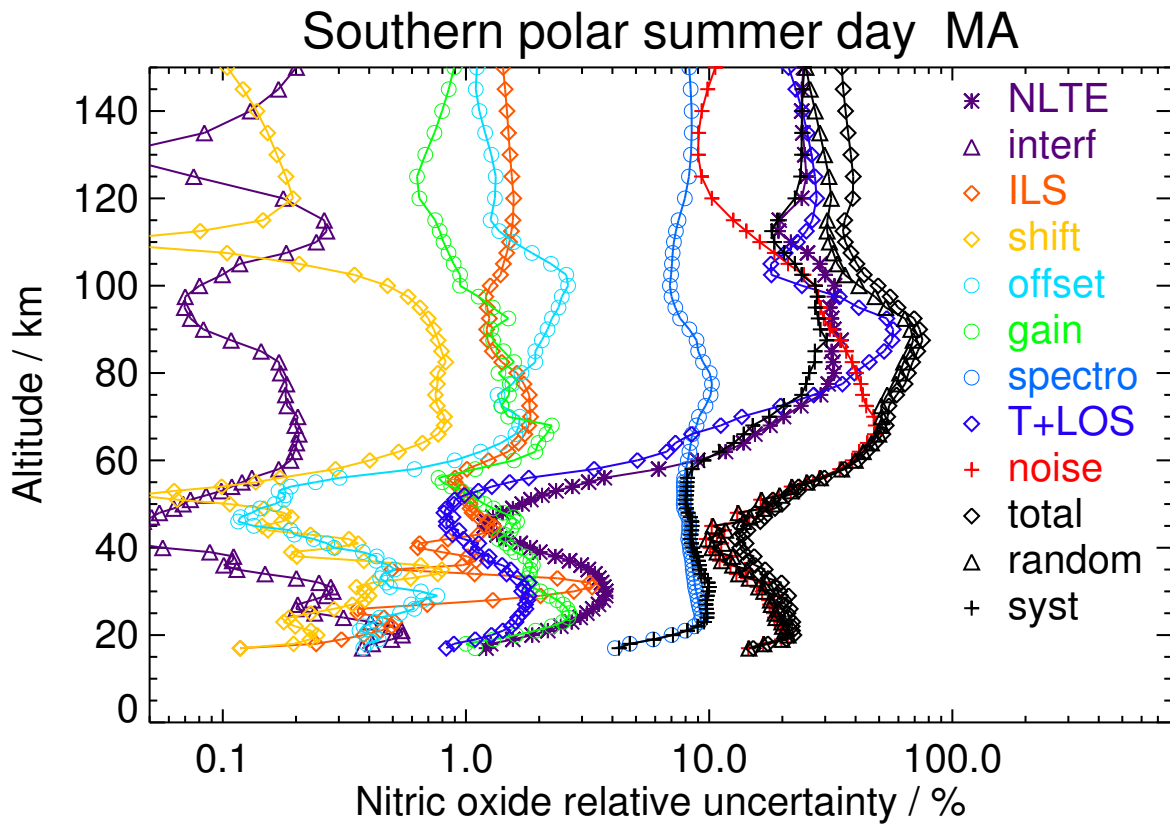

**Figure S31.** V8R\_NO\_561 Southern polar summer day

**Table S33.** Nitric oxide error budget for Southern polar summer night. All uncertainties are  $1\sigma$ .

| altitude (km) | mean target (ppmv) | NLTE (%) | interf (%) | ILS (%) | shift (%) | offset (%) | gain (%) | spectro (%) | T+LOS (%) | noise (%) | random (%) | syst (%) | total (%) |
|---------------|--------------------|----------|------------|---------|-----------|------------|----------|-------------|-----------|-----------|------------|----------|-----------|
| 40            | 0.00               | 1.68     | 0.81       | 0.40    | 0.07      | 0.89       | 0.11     | 0.74        | 0.74      | 41.50     | 41.52      | 1.88     | 41.57     |
| 50            | 0.00               | 8.49     | 0.55       | 0.92    | 0.30      | 1.68       | 4.33     | 4.23        | 7.18      | 44.67     | 46.12      | 5.71     | 46.47     |
| 60            | 0.00               | 17.43    | 0.36       | 1.80    | 0.21      | 1.93       | 2.76     | 8.84        | 7.63      | 56.32     | 59.19      | 11.09    | 60.22     |
| 70            | 0.04               | 12.61    | 0.28       | 1.60    | 0.37      | 1.61       | 1.15     | 8.27        | 6.21      | 44.54     | 45.44      | 13.85    | 47.50     |
| 80            | 0.05               | 14.93    | 0.45       | 0.75    | 0.55      | 2.84       | 0.56     | 7.67        | 17.44     | 48.82     | 51.92      | 16.81    | 54.58     |
| 90            | 0.71               | 27.53    | 0.53       | 1.30    | 0.64      | 3.88       | 1.13     | 7.38        | 16.62     | 49.04     | 52.70      | 27.12    | 59.27     |
| 100           | 7.07               | 22.21    | 0.48       | 1.20    | 0.57      | 3.56       | 1.10     | 6.08        | 17.72     | 35.74     | 41.63      | 20.11    | 46.24     |
| 110           | 24.61              | 16.37    | 0.43       | 1.12    | 0.26      | 2.44       | 0.89     | 5.70        | 22.39     | 25.16     | 34.94      | 14.90    | 37.99     |
| 120           | 51.27              | 16.06    | 0.14       | 1.18    | 0.08      | 1.00       | 0.47     | 6.64        | 23.43     | 8.96      | 25.89      | 16.24    | 30.57     |
| 130           | 73.42              | 18.60    | 0.13       | 1.34    | 0.15      | 1.24       | 0.60     | 7.30        | 21.02     | 8.98      | 24.20      | 18.43    | 30.42     |
| 140           | 108.96             | 19.55    | 0.23       | 1.42    | 0.12      | 1.29       | 0.68     | 7.39        | 18.83     | 11.32     | 23.71      | 19.01    | 30.39     |
| 150           | 138.32             | 19.98    | 0.29       | 1.42    | 0.08      | 1.35       | 0.71     | 7.15        | 16.53     | 13.01     | 23.27      | 18.85    | 29.95     |

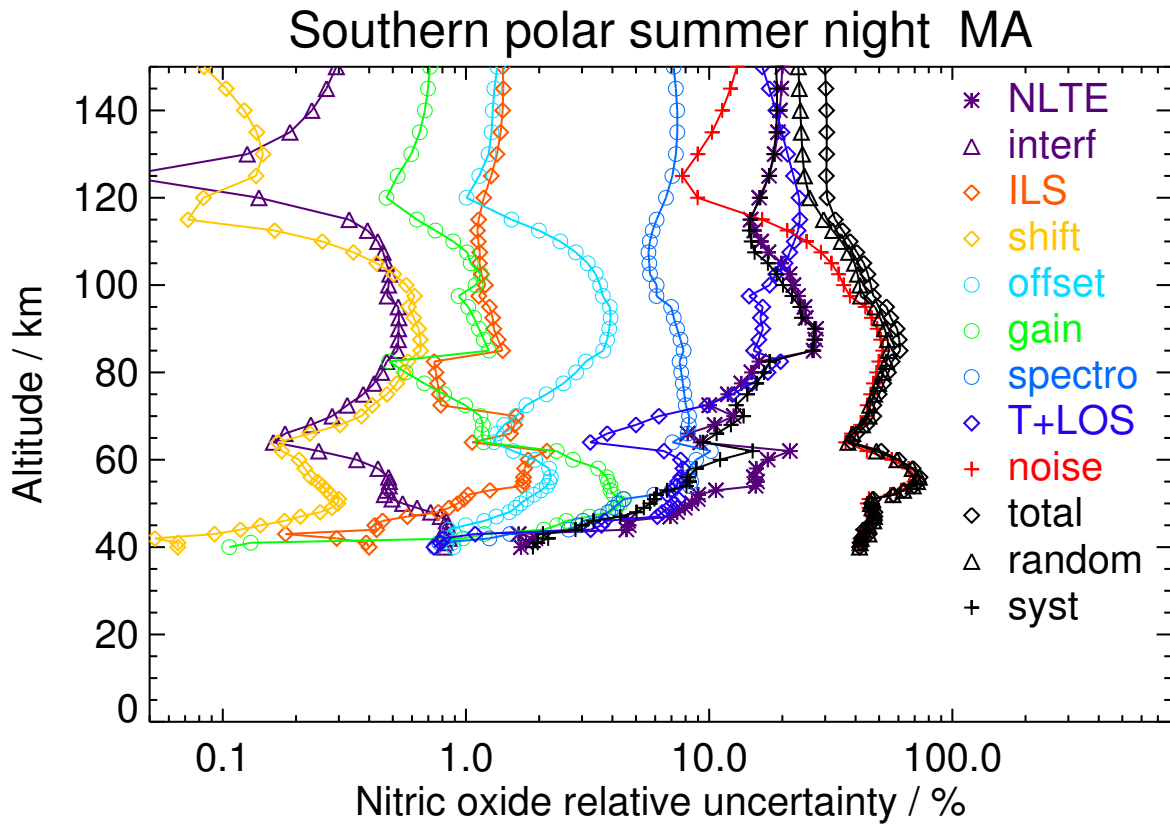

**Figure S32.** V8R\_NO\_561 Southern polar summer night

**Table S34.** Nitric oxide error budget for Southern polar autumn day. All uncertainties are  $1\sigma$ .

| altitude (km) | mean target (ppmv) | NLTE (%) | interf (%) | ILS (%) | shift (%) | offset (%) | gain (%) | spectro (%) | T+LOS (%) | noise (%) | random (%) | syst (%) | total (%) |
|---------------|--------------------|----------|------------|---------|-----------|------------|----------|-------------|-----------|-----------|------------|----------|-----------|
| 20            | 0.00               | 1.46     | 0.41       | 0.22    | 0.17      | 0.60       | 3.00     | 7.44        | 1.22      | 22.35     | 22.40      | 8.12     | 23.83     |
| 30            | 0.01               | 10.15    | 0.28       | 1.53    | 0.48      | 1.49       | 4.53     | 11.07       | 3.19      | 31.94     | 32.63      | 14.72    | 35.80     |
| 40            | 0.01               | 6.83     | 0.12       | 2.03    | 0.28      | 0.81       | 2.08     | 11.34       | 1.77      | 33.23     | 33.48      | 13.08    | 35.94     |
| 50            | 0.00               | 7.29     | 0.14       | 1.65    | 0.02      | 0.76       | 1.02     | 9.33        | 2.90      | 42.59     | 43.21      | 9.97     | 44.35     |
| 60            | 0.01               | 15.47    | 0.21       | 1.97    | 0.24      | 1.95       | 0.93     | 10.38       | 6.52      | 59.09     | 60.77      | 14.04    | 62.37     |
| 70            | 0.03               | 15.98    | 0.25       | 1.66    | 0.33      | 2.07       | 0.83     | 9.13        | 10.35     | 56.77     | 58.85      | 14.59    | 60.63     |
| 80            | 0.13               | 24.19    | 0.24       | 1.58    | 0.26      | 2.16       | 0.82     | 9.14        | 13.95     | 49.18     | 53.61      | 20.39    | 57.36     |
| 90            | 1.25               | 24.97    | 0.23       | 1.30    | 0.24      | 2.97       | 0.61     | 8.10        | 16.82     | 42.36     | 47.98      | 21.80    | 52.70     |
| 100           | 10.66              | 24.24    | 0.20       | 1.19    | 0.15      | 3.22       | 0.52     | 7.52        | 20.39     | 33.40     | 41.23      | 22.09    | 46.77     |
| 110           | 72.02              | 17.29    | 0.18       | 1.28    | 0.01      | 2.06       | 0.56     | 7.30        | 34.33     | 21.04     | 41.37      | 16.38    | 44.49     |
| 120           | 127.31             | 15.74    | 0.09       | 1.48    | 0.06      | 1.13       | 0.52     | 7.81        | 29.18     | 9.62      | 31.32      | 16.60    | 35.44     |
| 130           | 153.83             | 17.89    | 0.07       | 1.54    | 0.05      | 1.10       | 0.55     | 8.19        | 21.08     | 8.11      | 23.27      | 18.97    | 30.02     |
| 140           | 174.87             | 19.09    | 0.13       | 1.51    | 0.05      | 1.10       | 0.57     | 8.11        | 16.86     | 10.44     | 20.94      | 19.73    | 28.77     |
| 150           | 197.14             | 20.03    | 0.16       | 1.42    | 0.05      | 1.27       | 0.56     | 7.70        | 13.74     | 12.57     | 20.40      | 19.88    | 28.48     |

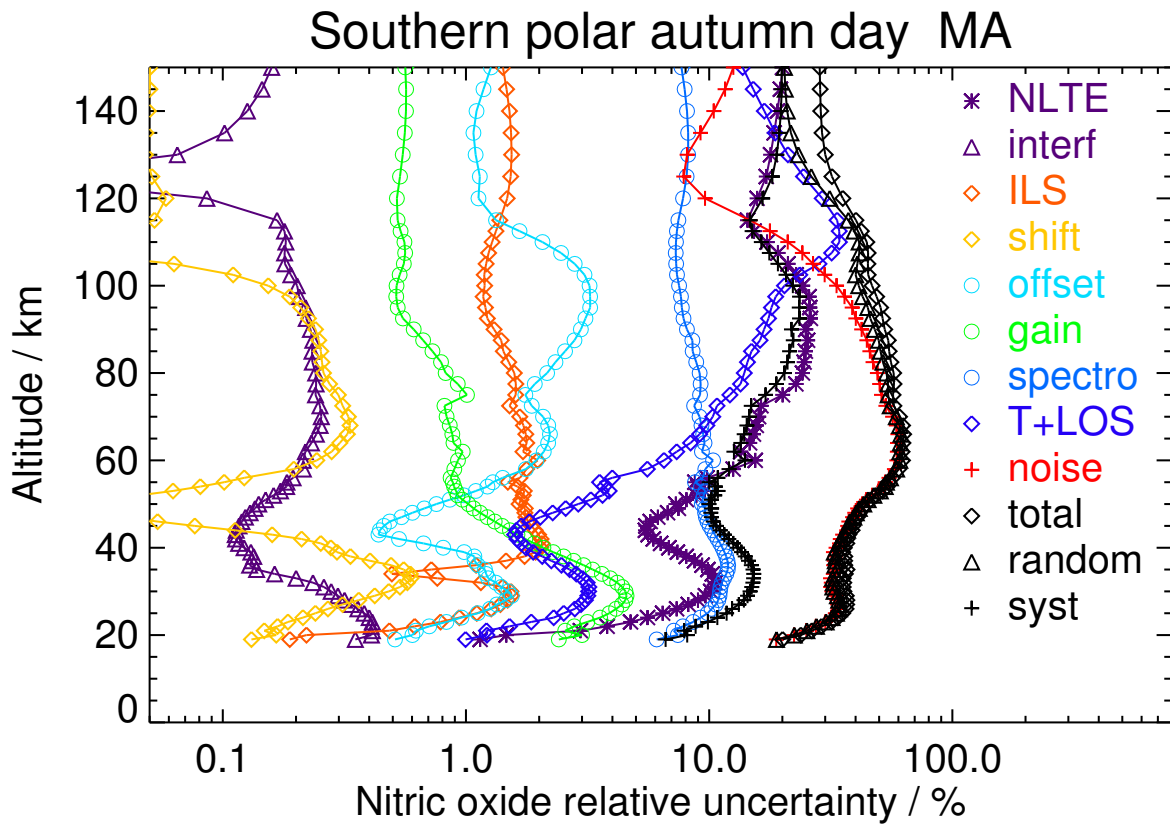

**Figure S33.** V8R\_NO\_561 Southern polar autumn day

**Table S35.** Nitric oxide error budget for Southern polar autumn night. All uncertainties are  $1\sigma$ .

| altitude (km) | mean target (ppmv) | NLTE (%) | interf (%) | ILS (%) | shift (%) | offset (%) | gain (%) | spectro (%) | T+LOS (%) | noise (%) | random (%) | syst (%) | total (%) |
|---------------|--------------------|----------|------------|---------|-----------|------------|----------|-------------|-----------|-----------|------------|----------|-----------|
| 50            | 0.00               | 12.50    | 0.17       | 1.09    | 0.10      | 0.90       | 0.52     | 10.93       | 5.02      | 51.04     | 52.72      | 11.39    | 53.93     |
| 60            | 0.02               | 14.20    | 0.18       | 1.29    | 0.12      | 1.39       | 0.89     | 9.91        | 5.74      | 46.88     | 48.81      | 12.35    | 50.35     |
| 70            | 0.08               | 15.11    | 0.19       | 1.22    | 0.26      | 1.86       | 0.81     | 9.44        | 7.32      | 54.03     | 55.74      | 13.75    | 57.41     |
| 80            | 0.40               | 24.27    | 0.23       | 1.15    | 0.33      | 2.03       | 0.86     | 9.78        | 9.36      | 51.90     | 54.94      | 21.29    | 58.93     |
| 90            | 3.69               | 22.46    | 0.19       | 0.96    | 0.38      | 2.81       | 0.77     | 9.11        | 11.91     | 44.58     | 48.17      | 20.15    | 52.22     |
| 100           | 23.66              | 19.85    | 0.17       | 0.79    | 0.26      | 2.82       | 0.69     | 7.81        | 21.06     | 34.16     | 41.30      | 19.22    | 45.55     |
| 110           | 117.69             | 23.13    | 0.17       | 1.09    | 0.07      | 1.90       | 0.53     | 7.24        | 34.86     | 21.78     | 42.74      | 21.32    | 47.77     |
| 120           | 142.48             | 19.78    | 0.10       | 1.56    | 0.05      | 1.04       | 0.53     | 8.26        | 28.29     | 11.34     | 31.60      | 19.82    | 37.31     |
| 130           | 184.74             | 20.21    | 0.05       | 1.70    | 0.05      | 0.88       | 0.54     | 8.71        | 19.72     | 7.14      | 21.87      | 21.21    | 30.47     |
| 140           | 218.33             | 21.26    | 0.11       | 1.70    | 0.03      | 0.99       | 0.54     | 8.74        | 15.31     | 9.43      | 19.15      | 22.12    | 29.26     |
| 150           | 232.97             | 22.05    | 0.14       | 1.62    | 0.02      | 1.18       | 0.51     | 8.40        | 12.17     | 11.82     | 18.72      | 22.32    | 29.13     |

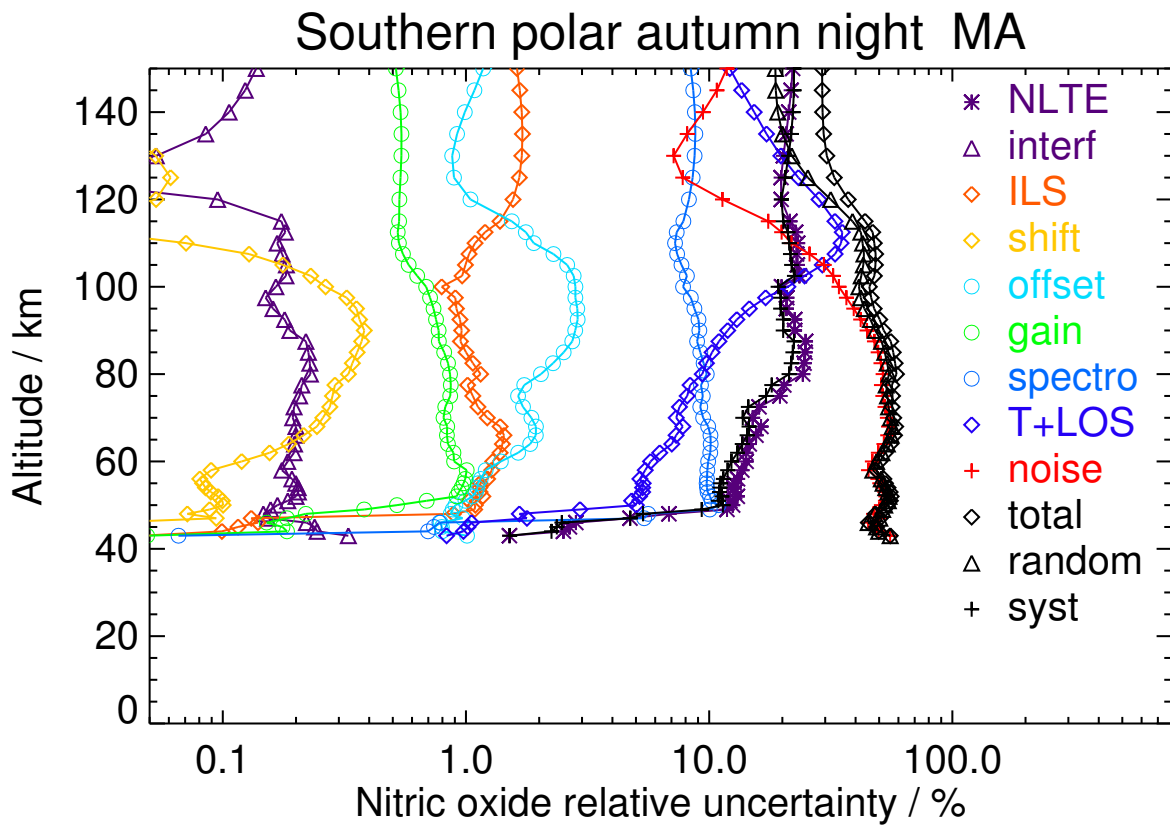

**Figure S34.** V8R\_NO\_561 Southern polar autumn night
